# Supplementary material for: A Comprehensive Analysis of the Genomic and Expressed Repertoire of the T Cell Receptor Beta Chain in <em>Equus caballus</em>
Source: Preprints.org preprint supplement (doi:10.20944/preprints202408.0599.v1), 2024-08-08
Supplement: Supplementary file 1 [file Figure S1(A) .pdf › Supplementary Files/Figure S1(A) .pdf]

(A)

|          |           | L-REGION      | FR1-IMGT<br>(1-26) |                | CDR1-IMGT<br>(27-38) | FR2-IMGT<br>(39-55) |               | CDR2-IMGT<br>(56-65) | FR3-IMGT<br>(66-104) |                  | CDR3-IMGT<br>(105-117) |               |            |            |         |       |       |          |          |           |          |         |         |         |         |         |     |     |  |
|----------|-----------|---------------|--------------------|----------------|----------------------|---------------------|---------------|----------------------|----------------------|------------------|------------------------|---------------|------------|------------|---------|-------|-------|----------|----------|-----------|----------|---------|---------|---------|---------|---------|-----|-----|--|
|          |           |               | A<br>(1-15)        | B<br>(16-26)   | BC<br>(27-38)        | C<br>(39-46)        | C'<br>(47-55) | C'C"<br>(56-65)      | C"<br>(66-74)        | D<br>(75-84)     | E<br>(85-96)           | F<br>(97-104) | FG         |            |         |       |       |          |          |           |          |         |         |         |         |         |     |     |  |
| TRGV     | gene_name | Functionality | 1                  | 10             | 15                   | 16                  | 23            | 26                   | 27                   | 38               | 39                     | 41            | 46         | 47         | 55      | 56    | 65    | 66       | 74       | 75        | 80       | 84      | 85      | 89      | 96      | 97      | 104 | 105 |  |
| TRBV1    | F         | MVLFPPVLWG    | VLM                | AAVNAT         | ASFVEQKPRWV          | LVAH                | GRAETLR       | CILR                 | NSQ.....YPW          | MSWYQQDL         | QGQLEVLAT              | LRS....SGD    | EEVVS      | SRPGA      | DYRIKRV | ND    | TELKL | HVANVTQ  | ARTLYCT  | C         | SK.....  | [6.6.2] |         |         |         |         |     |     |  |
| TRBV2-1  | P         | MRCPCGRDL     | PPTL               | GDF* <b>TQ</b> | RT*SQDPDKI           | WVTEM               | EEEVILR       | CNPI                 | SGH.....LY           | LYCYGEIL         | GQKVEFLIS              | FYN....ENL    | SEKSEIF    | FRD        | RFSVERP | DG    | SFSN  | LKIQRL   | REL      | GDSAVYF   | C        | ASSV... | [5.6.4] |         |         |         |     |     |  |
| TRBV2-2  | F         | MDSRLRFCC     | VIFGL              | LGVGHM         | ETGISQTPSH           | YIREM               | GQNISLR       | CEPI                 | SSH.....FY           | FYWYRQTL         | EKGVEFLIS              | VYN....KVP    | SEKADFL    | KD         | RFSAEMP | DG    | SRFT  | LKIQPVQL |          | GDSAVYL   | C        | ASSL... | [5.6.4] |         |         |         |     |     |  |
| TRBV2-3  | P         | MDTWLLC       | WVTF               | SLLEAGHT       | EPEVSQTPSH           | QITEM               | GQEVILR       | CDPV                 | SGH.....LN           | LYW* <b>RQIL</b> | GQKVEFLIS              | FYN....ENL    | SEKSEIL    | KD         | *FSAERS | DG    | SFST  | LKIQLTEV |          | GVSAYYL   | C        | ASSL... | [5.6.4] |         |         |         |     |     |  |
| TRBV3-1  | F         | MGSRLCC       | VALC               | LLGADPL        | DTSVSQTPEY           | LISQV               | GNKKT         | TLKCEQN              | LNH.....DA           | MYWYIQDS         | KKLLKIMFS              | YNN....KQP    | IVNETAS    | .N         | RFSPEAP | .DK   | AHLHL | HINSLEP  |          | GDSAVYF   | C        | ASSK... | [5.6.4] |         |         |         |     |     |  |
| TRBV3-2  | F         | MGSRLCC       | VALC               | LLGAGPL        | DTAVSQTPKY           | LISRV               | GNEKTLK       | CEQN                 | LSH.....NA           | MYWYVQDS         | KKLLKIMFS              | YNN....KQP    | IVNETAS    | .N         | RFSPEAP | .DN   | AHLNL | HINSLEP  |          | SDSAVYF   | C        | ASSQ... | [5.6.4] |         |         |         |     |     |  |
| TRBV3-3  | F         | MGSRLCC       | VALC               | LLGAGPL        | DTAVSQTPKY           | LISQV               | GNEKTLK       | CEQT                 | LGH.....NA           | MYWYQKDS         | KKLLKIMFI              | YNN....KER    | DLNETVP    | .S         | RFSPEAP | .DN   | AHLNL | HVSLEP   |          | GDSAVYF   | C        | ASSQ... | [5.6.4] |         |         |         |     |     |  |
| TRBV4-5  | P         | MS*RLC        | CCVAL              | CLLREVL        | MTGITQIAKH           | LVMGL               | RN*KSLK       | CEQH                 | LGH.....YP           | ICWYKQSV         | QKPLALMLV              | YNY....KEL    | SENKTVS    | .S         | RFLLECP | .DS   | SLSHL | HVDTELE  |          | *DSTVYF   | C        | ASSK... | [5.6.4] |         |         |         |     |     |  |
| TRBV5-1  | P         | MGSRFLCY      | VALC               | LLGTGPV        | DSGVVQT              | TPRHLIKAR           | GQQVPLR       | CSPI                 | SGH.....SR           | VSWYQQAL         | GQGPQFLIQ              | YYM....GRE    | NGKGDIL    | .D         | *FSGRQF | .SD   | YSSEL | NMSVLEL  |          | TDSALYL   | *        | ASSA... | [5.6.4] |         |         |         |     |     |  |
| TRBV5-2  | F         | MGSRLCC       | VALC               | LLGAGPV        | DSGVIQT              | TPRHLIKAK           | GQQMTLR       | CSPI                 | STH.....PY           | VYWYQQVL         | GQGPRLFIQ              | YFD....EKE    | NDRGDSS    | .D         | RFSGKQF | .SN   | YSSEL | LKVSLEL  |          | VDSALYL   | C        | ASSL... | [5.6.4] |         |         |         |     |     |  |
| TRBV5-4  | ORF       | MGSRLCC       | VALC               | LLGASAV        | DSGVTQT              | TPRHLIKTK           | GQQVTLR       | CSPI                 | SGH.....PR           | VSWYQQAL         | GQGPQFLFQ              | YYM....GRE    | NGKGDIP    | .D         | RFKGQQF | .SN   | YCSEL | -----    |          | TDSALYL   | C        | ASSA... | [5.6.4] |         |         |         |     |     |  |
| TRBV5-7  | F         | MSSTLLC       | VALC               | LLGAGPV        | DSGVTQT              | PRHLVKTR            | GQQVTLR       | CSFM                 | SGH.....DT           | VSWYRQPL         | GQGLQFLIQ              | YYR....GEE    | NGKGDFF    | .G         | RFKGQQ  | .DN   | YSSEL | LNVSLEL  |          | VDSALYF   | C        | ASSL... | [5.6.4] |         |         |         |     |     |  |
| TRBV5-12 | F         | MGYRLLC       | YVAL               | CLLGAGPV       | DSGVIQT              | PRHVVKAK            | RQQVMLK       | CSPI                 | SEH.....DT           | VSWYQQAL         | GQGPKFLIQ              | YYN....GEV    | REKGDIP    | .D         | RFSGQQF | .GN   | RSSEL | NLTILEL  |          | TDSALYL   | C        | ASSL... | [5.6.4] |         |         |         |     |     |  |
| TRBV5-13 | F         | MGSRLCC       | VALC               | LLGTGPV        | DSGVTQT              | TPRHLIKAR           | GQQVTLR       | CSPI                 | SGH.....NR           | VFWYQQPL         | GQGPQFLFY              | YYN....GKE    | NEKGDVP    | .A         | RFSGQQF | .SD   | YRSEL | LNVSLEL  |          | KDSALYL   | C        | ASSS... | [5.6.4] |         |         |         |     |     |  |
| TRBV5-15 | F         | MASRLCC       | VALC               | VLGTGPV        | DSGVTQT              | TPRHLIKAR           | GQQVTMR       | CSPI                 | SGH.....KS           | VFWYQQPL         | GQGPQFLVQ              | YYN....EKE    | NEKADTA    | .N         | RFLGKQF | .SN   | YSSEL | LNVSFLEL |          | TDSALYL   | C        | ASSV... | [5.6.4] |         |         |         |     |     |  |
| TRBV5-17 | P         | TGSRLC        | CRAML              | CLLGGGPV       | EAGVTET              | PRYLIKT             | GQAVTLR       | CS                   | SKH.....SG           | VSWYQQAL         | SQDPHLLFE              | FYE....NVQ    | RAKEIP     | .N         | RFSAQQL | .RD   | YRSEL | LNVSLEL  |          | MDSALYL   | C        | ASSV... | [5.6.4] |         |         |         |     |     |  |
| TRBV5-19 | F         | MGSRLCC       | VALC               | LLGAGPV        | DSGVTQT              | PKHLIKAK            | GQQMTLR       | CSPI                 | STH.....LS           | VYWYQQAL         | GQGPQFLIQ              | YYD....GEE    | REKGNIS    | .G         | RFSGQQF | .RD   | RSSEL | NVSILEL  |          | TDSALYL   | C        | ASSL... | [5.6.4] |         |         |         |     |     |  |
| TRBV6-1  | F         | MSGGLLC       | WVAF               | CLLQAGAV       | NAGVTQT              | PKFHILET            | GQNTTLR       | CAQD                 | MNH.....DS           | MYWYRQDL         | GHGLRLIRY              | SAG....AGV    | TEKRDVP    | .D         | GYRVS   | RS    | NT    | ENFSL    | TVLESATP |           | SQTSVYF  | C       | ASS*    | [5.6.4] |         |         |     |     |  |
| TRBV6-2  | F         | MSGGLLC       | WVAF               | CLLQAAV        | NAGVTQN              | PKFQVLGT            | GQNMTLR       | CAQD                 | MNH.....SY           | MYWYRQDL         | RHGLRLIHY              | SRA....ANV    | TEKGDIP    | .E         | GYRVS   | SRP   | .NT   | ENFL     | FTVESATP |           | SQTSVYF  | C       | ASSY... | [5.6.4] |         |         |     |     |  |
| TRBV6-3  | F         | MSGGLLC       | WVAF               | CLLQAAV        | NAGVTQT              | PRFQVLR             | GENTTLR       | CTQD                 | MNH.....NS           | MYWYRQDL         | GHGLRLIHF              | SVG....ADA    | TANRDVP    | .D         | GYRVS   | RS    | .DT   | KNFAL    | MLESATP  |           | SQTSVYF  | C       | ASS*    | [5.6.4] |         |         |     |     |  |
| TRBV6-4  | F         | MSGGLLC       | WVAF               | CLLQAAV        | NAGVTQT              | PRFQILGT            | GQNTTLR       | CAQD                 | MNH.....NS           | MYWYRQDL         | GHGLRLIRY              | SAG....AGV    | TEE        | .DGP       | .D      | GYRVS | RS    | .DT      | KNFSL    | TLVSATP   |          | SQTSVYF | C       | ASSY... | [5.6.4] |         |     |     |  |
| TRBV6-5  | F         | MSGGLLC       | WVAF               | CLLQAGAV       | NAGVTQT              | PKFHILET            | GQNTTLR       | CAQD                 | MNH.....DY           | MYWYRQDL         | GHGLRLIHY              | SRT....SGV    | TEARDIP    | .D         | GYRVS   | RS    | .NT   | ENFL     | TLVSPPT  |           | SKTSVYF  | C       | ASSY... | [5.6.4] |         |         |     |     |  |
| TRBV6-6  | F         | MSGGLLC       | WVAF               | CLLQAGAV       | NAGVIQT              | PKFQVLKT            | GQNTTLR       | CTQD                 | MNH.....DS           | TYWYRQDL         | GHGLRLIHY              | SVG....AGV    | TANRDVP    | .D         | GYRVS   | RS    | .NT   | ENFPL    | LIVSATP  |           | SQTSVYF  | C       | ASS*    | [5.6.4] |         |         |     |     |  |
| TRBV7-2  | F         | MGTRLLS       | FMFT               | FCLLGADHT      | DAGISQSP             | PRHRVTER            | GQDAALK       | CDPI                 | SGH.....TY           | LYWYRQTL         | GQNLEFLTY              | FQD....DLA    | SDTSGMPND  |            | RYSAKRP | .EG   | SSST  | LKIQHAEQ |          | GDSALYL   | C        | ASSS... | [5.6.4] |         |         |         |     |     |  |
| TRBV7-3  | P         | MEHICVL       | SCVT               | LCLLGAGHT      | DAGVQP               | SPRHRVTER           | VQAAVAL       | CDPI                 | CGG.....AT           | LYWYQQTL         | RQGPPEFLIY             | FMN....KNV    | PDIP       | PGTPNI     |         | PFS   | PERP  | .EG      | GD*      | IVYL      | C        | ASSS... | [5.6.4] |         |         |         |     |     |  |
| TRBV7-7  | F         | MGTRLLC       | CLTL               | CLLGAGHT       | DTGVSQSP             | PRHRVTKY            | GEDVAFR       | CDPI                 | SEH.....TR           | LYWYRQTP         | GQNMEFLTY              | FQN....DFA    | SDTSGMPSD  |            | RFS     | AERP  | .KG   | SYST     | LKIQRAEQ |           | RDSAVYL  | C       | ASSL... | [5.6.4] |         |         |     |     |  |
| TRBV7-9  | F         | MGTRLLC       | CLTL               | FCLLGTDHT      | KAGVCQSP             | PRNRVSR             | GQDVAFK       | CDPI                 | SEH.....TQ           | LCWYRETL         | GKGLEFLMY              | FQD....DFA    | SDTSGMLKD  |            | QFSAERP | .EG   | SSPIL | LKIQHTEQ |          | GDSAVYL   | C        | QQLS... | [5.6.4] |         |         |         |     |     |  |
| TRBV7-11 | F         | MGTRILC       | WVTL               | CLLGADHT       | DAGVQSQSP            | PRHRVTER            | GQDVAFK       | CDPI                 | SGH.....TH           | LYWYRQTR         | GQGLEFLMY              | FRD....DFA    | SDTSGMLKD  |            | WFS     | AERP  | .EG   | SSST     | LKIQHAEQ |           | GDSAVYL  | C       | QQLS... | [5.6.4] |         |         |     |     |  |
| TRBV8-3  | P         | VSLNFFC       | VTLC               | LLGAGPM        | DAGITQK              | PRYHITQT            | GDKMILE       | CSQT                 | MSH.....LA           | MFWYRQDP         | GQGPRLIHY              | SGD....VNS    | TAKGDIT    | .E         | GYSVSRN | .KK   | EDF   | TVLESAT  |          | KQTSLYL   | C        | ASSK... | [5.6.4] |         |         |         |     |     |  |
| TRBV8-4  | ORF       | MSLNFFC       | VTLC               | LLGAGPM        | DAGITQK              | PRYHITQT            | GGKTILE       | CSQN                 | MSH.....FA           | MFWYRQDP         | GQGPRLIHY              | SSG....VNS    | TAKGDIT    | .E         | GYSVSRK | .KI   | EDFP  | TVLESAT  |          | KQTSLYL   | C        | ASSK... | [5.6.4] |         |         |         |     |     |  |
| TRBV8-5  | ORF       | MSLNFFC       | VTLC               | LLGAGPM        | DAGITQK              | PRYHITQT            | GDKMILE       | CSQT                 | MSH.....FA           | MFWYRQDP         | GQGPRLIHY              | SSG....VNS    | TAKGDIT    | .E         | GYSVSRK | .KI   | EDFP  | TVLESVST |          | KQTSLYL   | C        | ASSE... | [5.6.4] |         |         |         |     |     |  |
| TRBV8-7  | P         | MSLNFFC       | VTLC               | LLGAGPM        | DAEITQT              | TPR*HITQT           | GDKMILE       | CSQN                 | MSH.....LS           | MFWYQQDP         | GEGPRLIHY              | STD....VRS    | TTRGNVP    | .E         | GYSVFRN | .KK   | ENFP  | TVLESAT  |          | NQTSLYP   | C        | ASSE... | [5.6.4] |         |         |         |     |     |  |
| TRBV10-1 | F         | MGTRLF        | FCCVAL             | CFLWTGQVD      | AGAGITQ              | SPHKITAT            | GKRVTLT       | CHQT                 | QKH.....DY           | MYWYRQDL         | GHGLKLIHY              | SYD....ILK    | TEEGEVP    | .D         | GYNVSR  | .NI   | EDFP  | TVLESATP |          | SQTSVYF   | C        | ASSY... | [5.6.4] |         |         |         |     |     |  |
| TRBV10-2 | P         | MYTRLF        | FCCVAL             | CFLWTGQVD      | AGAGITQ              | SPHKITGT            | GKMVTLT       | CHQT                 | QNH.....DY           | MCWY*QDR         | GHGLRLIHY              | SNG....IGS    | TDKGEVH    | .D         | GYSVSR  | .ST   | ENFP  | TVLESATP |          | SQTSVYF   | C        | ASSY... | [5.6.4] |         |         |         |     |     |  |
| TRBV10-3 | P         | MGIGLF        | FCCVAL             | CFLWTGQVD      | AGAGITQ              | SPHKITGT            | GKRVTLR       | CHQT                 | QNH.....DY           | MY*YQDDL         | GHGLRLIHY              | SNG....IDS    | TDKGEVP    | .D         | GYRVSR  | .NT   | ENFP  | TVLESATP |          | SQTSVYF   | C        | ASSY... | [5.6.4] |         |         |         |     |     |  |
| TRBV11-4 | F         | MGTRFLC       | WVTL               | CLLGAELT       | EGGVTSQSP            | PRHMITGK            | GQAVALW       | CDPI                 | SGH.....RA           | LYWYQQTL         | GQGLGLLIS              | FED....EAV    | ADDSQLPKH  |            | RFS     | AERS  | .KG   | GDSP     | LQIKPAEL |           | GDSAMYF  | C       | ASSL... | [5.6.4] |         |         |     |     |  |
| TRBV12-1 | ORF       | MGTWALC       | CVLL               | CLLGVEPI       | DAGVNTQ              | TPRHQVTKM           | GQAVTLR       | RREPI                | SSH.....TA           | LFWYRQTS         | VQGLEFLFY              | FHD....QIA    | IDQKGRSKD  |            | RFS     | AEMP  | .NR   | SLST     | LKIQCTEP |           | RDSAVYL  | C       | ASSL... | [5.6.4] |         |         |     |     |  |
| TRBV12-2 | F         | MATRLLC       | VALC               | LLGVEPT        | DAGVIQT              | PRHQLT              | TKM           | GQTVTLT              | CEPI                 | STH.....DT       | VFWYRQTS               | VKGLEFLIY     | FRD....QAP | MDKTGMPND  |         | RFS   | AEMP  | .NG      | SFST     | LKIQRTPE  |          | GDAAVYL | C       | ASSL... | [5.6.4] |         |     |     |  |
| TRBV12-4 | P         | LATRLLC       | CVAF               | YLLGVEPT       | DARVTQIP             | PRHYVTEM            | EQAVTL*       | CEPI                 | YSH.....DT           | LF*YRQTE         | VQ*LLELLN              | SCR....RDV    | MNETGMPKD  |            | RFS     | AEMS  | .DG   | SFPT     | LKIRHTEP |           | GDSAMCL  | C       | ASSL... | [5.6.4] |         |         |     |     |  |
| TRBV12-5 | F         | MGRALCC       | CVLL               | CLLGREST       | DAGVTQE              | PRHYVTKM            | RQAVTLT       | CEPV                 | SNH.....TA           | LFWYRQDP         | VKGLKFLIY              | LRN....QAP    | IAQTGMPKD  |            | RFS     | AEMP  | .NR   | SLST     | LKIQRTPE |           | GDSAMYI  | C       | ASSL... | [5.6.4] |         |         |     |     |  |
| TRBV12-6 | P         | MGRTRL        | C                  | CVLLC          | LLGVEPT              | DAGVTQE             | PRHQVTKV      | GQTVTLR              | CEPI                 | SSH.....TA       | LFWYRQTL               | LQGLEVLIS     | FGN....QSP | IDETGMPKD  |         | WFS   | AEMP  | .DR      | SF*      | TLKIQCTEP |          | EDSAMYL | C       | ASSL... | [5.6.4] |         |     |     |  |
| TRBV12-7 | F         | MDTWALC       | CVLL               | CLLGVEPI       | DSGVTQE              | PRHQVTKM            | GQDVTLR       | CEPI                 | SSH.....TD           | LFWYRQTS         | VQGLEFLIY              | FSN....QAV    | IDQTGMPKD  |            | RFS     | AEMP  | .NR   | SFST     | LKIQHTEP |           | RDSAVYL  | C       | ASSL... | [5.6.4] |         |         |     |     |  |
| TRBV13-3 | P         | MLHLVL        | PEYP               | WAVQLCC        | VALC                 | LLGAGP-             | EDAVI*        | SPRHLIKG             | GGKAVLI              | CYPS             | SGH.....SS             | VWFQQAL       | GQSPHFLTE  | YYE....KEQ | REKGNIP | .D    | RFS   | AQQF     | .SE      | YSSEL     | LDVSSLEL |         | EDSALCL | C       | ASSS... | [5.6.4] |     |     |  |
| TRBV13-4 | F         | MLCLVLP       | PESARGT            | QLCCVAL        | RLLLEGPA             | GAGVIQF             | PKHLIKGM      | GKNVTLK              | CYPS                 | SGH.....SS       | VCWFQQAL               | GQGPQFLIK     | YYE....KEQ | GKERNIP    | .D      | RFS   | AQQF  | .SD      | YSSEL    | LDVSSLEL  |          | EESALYL | C       | ASSS... | [5.6.4] |         |     |     |  |
| TRBV14-1 | P         | MVSMLLS       | LVSL               | CLLGARHT--     | SAGVTQF              | PSHGVIEK            | KQSVTLR       | CDPI                 | SGH.....EG           | LYWYRHAV         | GKEIKFLY               | FLR....EDK    | QDDSGMPNE  |            | *FSAERT | .GG   | TFST  | LKVQHAEQ |          | EDSGVYF   | C        | GSSQ... | [5.6.4] |         |         |         |     |     |  |
| TRBV14-2 | F         | MVSMLLN       | LVCL               | CLLGARHTVE     | SAGVTQF              | PNHRVIEK            | KQAVTLR       | CDPI                 | SGH.....EA           | LYWYRRAY         | GKEIKFLVY              | FLG....EDK    | QDDSGMPNK  |            | QFSAERI | .GG   | TFST  | LNQHAEQ  |          | EDSGVYF   | C        | ASSQ... | [5.6.4] |         |         |         |     |     |  |
| TRBV14-3 | F         | MVFMLLS       | LVCL               | CLLGARHTVE     | SAGVTQF              | PNYRVIEK            | KQAVTLR       | CDPI                 | SGH.....AS           | LYWYRRAY         | GKEIKFLVY              | FLR....KDK    | QDDSGMPNE  |            | RFS     | AERT  | .EG   | TFST     | LKVQHAEQ |           | EDSGVYF  | C       | ASSQ... | [5.6.4] |         |         |     |     |  |
| TRBV14-4 | F         | MLSMLLS       | LVSL               | CLLGARHT       | SAGVTQF              | PSHRVIEK            | KQSVTLR       | CDPV                 | PGH.....QA           | LFWYQRAV         | GKEITFLIY              | FLR....ENK    | QDES       | GMSNK      |         | RFS   | AERT  | .NG      | TFST     | LKIQPAEL  |          | EDSGVYF | C       | ASSQ... | [5.6.4] |         |     |     |  |
| TRBV15-1 | F         | MDLRLLY       | CVAL               | CLLRVGHM       | AAMVTQK              | PRYQVARK            | GKPVTL        | CS                   | PN                   | LNH.....KY       | MYWYQKQP               | SQAPKLLFS     | YYD....KEF | NNETDTS    | .D      | NF    |       |          |          |           |          |         |         |         |         |         |     |     |  |

|          |     |                                              |                 |                          |             |          |            |            |            |            |                            |          |         |         |
|----------|-----|----------------------------------------------|-----------------|--------------------------|-------------|----------|------------|------------|------------|------------|----------------------------|----------|---------|---------|
| TRBV16-4 | F   | MCSIFICFMVLS-LLGAGAL                         | DAEVTQTPGHLVEGK | EQKVKMYCVPK              | KGH.....SY  | VFWYQQNL | AKKFKFLIS  | FQY....ENI | FGETEMPKE  | RFSAECP.PN | SPCSLEIPPTTEL              | QDSAVYLC | ANSE... | [5.6.4] |
| TRBV16-5 | F   | MSPIFICFMVLSHLLGAGVL                         | DAAVTQTPGQLIKGK | EQKVKMYCVPK              | KGH.....PF  | IFWYQQNL | AKEFKFLIS  | FQN....ENI | LEETEMPKE  | RFSAECP.PN | SPCSLEIHPTEL               | QDSAVYLC | ASGE... | [5.6.4] |
| TRBV18-3 | P   | MGSTLFCWVVIWLLGAGPT                          | NSSVIQDPRHLVRGR | GQEATSRCSLV              | RAY.....SR  | VYWCQRHL | *ESLKFMiy  | L*K....*KV | IHNSARSAK  | RFSAEFP.KE | GPSVLKIQLAEL               | RDSAVYSC | ARS*... | [5.6.4] |
| TRBV18-6 | P   | MGPRLLCWVLIWLLGADPT                          | NAGNIQEPTNLVRER | GQEATLSCGPV              | TGH.....SH  | VYWY*TVL | *KGLKFMID  | LQK....ENV | TYES*MPIT  | HFSAEFP.KQ | GHSVFNI*LAEL               | GDSAVYF* | ARS*... | [5.6.4] |
| TRBV20-3 | F   | MGDDDSRKSEKILQNKQDSGLGL                      | GALVSQHPSKAICMN | GTSVKIECRAM              | DFQ.....AQT | MFWYRQLP | KQGLTLMVA  | SSDN...SSI | TYEQGFTRA  | KFPINHL.NR | TFSTLTVMVSVHP              | ADSGLYFC | SAS.... | [6.7.3] |
| TRBV20-7 | P   | MGDYDPRESDRKTSSENTQDSGSGGL                   | GVLVSQHPSRAICKN | GSSVEMECRTV              | DLE.....AQT | VCWYHQLP | NQGITLIAT  | SIQG...SDP | TYEQGFPPKV | KFPISHP.NL | TLSTLTILSAHP               | ANSGLYFC | GAS.... | [6.7.3] |
| TRBV21-1 | F   | MCHRLCCVALFFWGAGSM                           | DTKVTQRPGLVKGK  | EQKAKMDCFPi              | KTH.....IH  | VYWYRRKL | EGEFEFLVY  | VRN....GEI | TDKIEGFDQ  | QFSVERS.QD | ERYSLLEIKSTEP              | GDSALYFC | ASSE... | [5.6.4] |
| TRBV21-2 | F   | MSLRLCCVALFFWGAGSM                           | DTKVTQRPGLVKGK  | EQKAKMTCVPI              | KAH.....IH  | VYWYRRKL | EGEFEFLVY  | LQN...NDV  | IDKIEGFDQ  | QFSAQCP.KN | ASCSLEIKSTEP               | GDSALYFC | ASSE... | [5.6.4] |
| TRBV21-3 | F   | MCCRLLCCVALFFWGAGSM                          | DTKVTQRPGLVKGK  | EQKAKMDCVPI              | KTH.....SY  | VYWYRRKL | EGEFEFLVY  | LQN....GKI | TDKIEGFDQ  | QFSAQCP.QD | ASCSLEIKSTEP               | GDSALYFC | ASSE... | [5.6.4] |
| TRBV21-4 | F   | MQCRLCCVALFFWGAGSM                           | DTKVTQSPGLVKGK  | EQKAKMDCVPV              | KTH.....SY  | VYWYRQKL | EGEFDLFLVY | LGN....GKI | TDKIEGFDQ  | QFSAQCP.QD | ASCSLEIKSTEP               | GDSALYFC | ASSE... | [5.6.4] |
| TRBV22-1 | P   | MGSWALCYIAFCLLGAGPV                          | DAKIYQMPAFLLTGA | E*DVTVECKQN              | LEY.....NA  | MYQYRQNP | GQGLRLIYY  | SQV....VNY | VHKGDVP.E  | GHAFSRE.ET | EMSP <sup>L</sup> TVRLAHI  | NQTGLYLY | SG..... | [5.6.2] |
| TRBV22-2 | ORF | MGCRA <sup>L</sup> LCYIAFCLLGAGPV            | DAKIYQMPAFLLTGV | EQDVTLECKQN              | LEY.....ND  | MYQCRKDP | GQGLRLIYY  | SQV....VNY | VHKGDVP.E  | GHAFSRE.ET | EMSP <sup>L</sup> TVRLAHI  | NQTGLHLY | SG..... | [5.6.2] |
| TRBV24   | P   | MASMLCCVAFCLLG <sup>T</sup> GSM              | DTGVTQTPRNRITKT | GKSVVPEC <sup>S</sup> QT | KGH.....DQ  | MYWYRQDL | GLGLQLIYY  | SYD....VND | ISKGEIS.G  | GYSEF*K.EK | VKFFLSLEMAVA               | NQMALYFW | ASSYL.. | [5.6.5] |
| TRBV25   | F   | MAVRLWYVALYLLRAGLM                           | DADVFQTPKHCVTGT | GKKITLECFQS              | MNH.....DN  | MYWYRQDA | GRELQLLHY  | SYG....VNN | TEKGDVP.S  | ESTVSRL.RK | DRFSLTLESASP               | SQTSLYLC | ASS*... | [5.6.4] |
| TRBV27-1 | F   | MGPWLLGYIMLCLLGAGPM                          | DAKVIQTPRHLITET | GKKLTVNCSQD              | MNH.....DA  | MYWYRQDP | GLGLKLIHY  | STN....VEV | LYNGDVP.D  | GYTVSRK.DK | GNFSLTLESASI               | NQTSLYLC | ASSE... | [5.6.4] |
| TRBV27-2 | F   | MGPQLLGCVMCLLGAGLM                           | EAKVTQAPRHLIEET | GKKLTVNCSQD              | MNH.....DT  | MYWYRQDP | GLGLKLIHY  | SIN....EIL | -YKGDVP.D  | GYAVSRK.DT | GEFPLTLESASI               | NQTSLYLC | ASSE... | [5.6.4] |
| TRBV28-1 | F   | MGIRLLCVVAFCFPGLGFM                          | DATVTQTERYLVKRR | GDKVVMHCQQN              | MDH.....NS  | MFWYRQDP | ALGLQLLHF  | SYR....IDD | EQKGDAP.E  | GYSVSRK.KK | ENFTLILESAST               | NQTSVYLC | ASSF... | [5.6.4] |
| TRBV28-2 | F   | MGFTLLCAVTF <sup>C</sup> FLGVGFM             | DTNVTQTPRYLVKRI | REKVVMECSQN              | MDH.....ET  | MLWYRQDP | ALGLQLLHF  | SIG....IDD | KQEGDAP.E  | GYSVSRK.KK | ENFTLILESAST               | NQTSVYLC | ASSF... | [5.6.4] |
| TRBV28-3 | F   | MGFTLLCAVAF <sup>C</sup> FLGQGF <sup>M</sup> | DATVTQTERYLVKRR | GDKVVMD <sup>C</sup> QQN | MDH.....NS  | MFWYRQDP | ALGLQLLYF  | SDS....VGD | KQEGDDP.E  | GYSVSRK.KK | ENFTLILEPAST               | NQTSVYLC | ASSL... | [5.6.4] |
| TRBV29   | F   | MLTFLLLLLELGSVF                              | GALLSQKPSRAICQR | GTTMKIQCEVD              | TEL.....TL  | MFWYSQLP | GQSLTLIAT  | ANQG...SEA | TYESGFTKD  | KFPISRP.TL | RFSTLT <sup>V</sup> VNNTSP | EDSSFYFC | SAG...  | [5.7.3] |
