# Supplementary material for: A Comprehensive Analysis of the Genomic and Expressed Repertoire of the T Cell Receptor Beta Chain in <em>Equus caballus</em>
Source: Preprints.org preprint supplement (doi:10.20944/preprints202408.0599.v1), 2024-08-08
Supplement: Supplementary file 1 [file Figure S3.xlsx]

## Sheet: Foglio1
TRBJ gene	ID	TRB clonotype	TRBD gene	TRBV gene	CDR3 length (AA)
TRBJ1-1	ERR2584215.7700638.2	FCSATDSKMNTEVFFGEGTRLTVVENLNQVTLPKVAVFEPS	TRBD1	ND	12
	ERR2584215.11125476.1	MGDSAVYLCASITLGRGPSMNTEVFFGEGTRLTVVENLNQVT	ND	TRBV15-2	16
	ERR2584215.14069866.1	STLKIQRTEPGDAAVYLCASSVRDSNTEVFFGEGTRLTVVE	TRBD1	TRBV12-2	12
	ERR2584215.5359892.2	SVYFCASSFPGSLNTEVFFGEGTRLTVVENLNQVTLPKVAV	ND	TRBV6	13
	ERR2584215.4180972.1	LKVQHSELEDSGVYFCASSQGPGTANTEVFFGEGTRLTVVEN	TRBD1	TRBV14-3	14
	ERR2584214.9693047.1	YLCASSFQFSGTEVFFGEGTRLTVVENLNQVTLPKVAVFEPS	ND	TRBV28	12
	ERR2584214.8617885.1	QPVQLGDSAVYLCASSLGQATEVFFGEGTRLTVVENLNQVT	TRBD1	TRBV2-2	11
	ERR2584214.1137378.2	GDSALYFCASSLQSVEPEVFFGEGTRLTVVENLNQVTLPKVA	ND	TRBV21	12
	ERR2584215.3912256.2	GNFSLTLESASINQTSLYLCASSRRDIDWEVFFGEGTRLTVVE	ND	TRBV27-1	9
	ERR2584214.4490989.1	IQRTEPGDAAVYLCASSPGQYPIQVFFGEGTRLTVVENLNQV	TRBD1	TRBV12-2	12
	ERR2584214.9298191.2	VYFCASSQSALGREVFFGEGTRLTVVENLNQVTLPKVAVFEP	ND	ND	12
	ERR2584215.13843507.2	STEPGDSALYFCASSEFRQQAEVFFREGTRLTVVENLNQVTL	TRBD1	TRBV21	12
TRBJ1-2	ERR2584215.1548053.2	TDSALYLCASSVGAGDNYDYHFGPGTKLTVIENLNQVTLPKV	TRBD1	TRBV5-15	13
	ERR2584214.2015435.2	LCASSESSSNYDYHFGPGTKLTVIENLNQVTLPKVAVFEPS	ND	ND	12
	ERR2584215.7852129.1	SVSVLELVDSALYFCASSLGTNYDYHFGPGTKLTVIENLNQV	TRBD1	TRBV5-7	11
	ERR2584215.4008873.1	VGDSAVYLCASRGAAPNYDYHFGPGTKLTVIENLNQVTLPK	ND	TRBV15-5	12
	ERR2584215.2421951.2	GDSALYFCASSEWRGNYDYHFGPGTKLTVIENLNQVTLPKVA	ND	TRBV21	12
	ERR2584214.6690309.2	QTSVYLCASSPDRDSRYYDYHFGPGTKLTVIENLNQVTLPKV	TRBD1	TRBV28	14
	ERR2584215.12194999.2	YLCASSFGAGVYDYHFGPGTKLTVIENLNQVTLPKVAVFEP	TRBD1	TRBV28	12
	ERR2584215.10412558.2	LYFCSARPLAYDYHFGPGTKLTVIENLNQVTLPKVAVFEPSE	ND	TRBV20	10
	ERR2584215.3424808.2	ILESASTNQTSVYLCASSDSLGRAYDYHFGPGTKLTVIENLN	TRBD1	TRBV28	13
	ERR2584215.12929436.1	TVTSAHPADSSLYFCSASGVATHDYHFGPGTKLTVIENLNQ	TRBD2	TRBV20-8	11
	ERR2584215.6177568.2	IQRTEPGDAAVYLCASSFLWTAGENDYHFGPGTKLTVIENLN	TRBD1	TRBV12-2	13
	ERR2584215.5430657.1	SASTNQTSVYLCASSFKGNDYHFGPGTKLTVIENLNHVTLPK	ND	TRBV28	10
	ERR2584214.7242947.1	SAHPADSSLYFCSAWGRETIDDYHFGPGTKLTVIENLNQVT	TRBD2	TRBV20-8	11
	ERR2584215.10839187.2	QTSLYLCATREGRADQGDYHFGPGTKLTVIENLNQVTLPKV	TRBD1	TRBV27	13
	ERR2584215.2425333.2	LEIKSTEPGDSALYFCASNEQQSGDYHFGPGTKLTVIENLNQ	TRBD1	TRBV21	11
	ERR2584214.7031366.2	SLYLCASTSGAGRDYHFGPGTKLTVIENLNQVTLPKVAVFEP	TRBD1	ND	11
	ERR2584214.708270.1	QRDSAVYLCASSFGAGTAGRDYHFGPGTKLTVIENLNQVTLP	TRBD1	TRBV7-7	13
	ERR2584215.12474144.2	LCASSAKNGTAGLDYHFGPGTKLTVIENLNQVTLPKVAVFEP	TRBD1	ND	13
	ERR2584215.11830884.1	RTEPGDAAVYLCASSFVVSETAGLWDYHFGPGTKLTVIENL	TRBD1	TRBV12-2	16
	ERR2584215.8700476.2	HLNLHVSSLEPGDSAVYFCASSQDVSGDYHFGPGTKLTVIE	ND	TRBV3-3	11
	ERR2584215.2459193.1	SQTSVYFCASSYGGTGTAERLDYHFGPGTKLTVIENLNQVT	TRBD1	ND	16
	ERR2584214.10498496.2	LCASSFSQFVGDYHFGPGTKLTVIENLNQVTLPKVAVFEPSE	ND	TRBV28	12
	ERR2584214.4070692.2	DSALYFCASSELAAVSDYHFGPGTKLTVIENLNQVTLPKVA	ND	TRBV21	12
	ERR2584214.2389434.1	NYSSELNVSFLELTDSALYLCASGTAGDYHFGPGTKLTVIEN	TRBD1	TRBV5-15	9
	ERR2584215.3062418.1	SFSTLKIQRTEPGDDSALYLCASPDLRWYHFGPGTKLTVIEN	ND	TRBV12-2	10
TRBJ1-4	ERR2584215.12598535.1	ELKDSALYLCASSAPGLEEEKLFFGNGTKLSVLENLNQVTLP	ND	TRBV5-13	13
	ERR2584215.7056697.1	CASSQGDRGLNEKLFFGNGTKLSVLENLNQVTLPKVAVFEPS	ND	ND	14
	ERR2584215.6911553.2	ILELTDSALYLCASSLGQQMNEKLFFGNGTKLSVLENLNQVT	TRBD1	TRBV5-12	13
	ERR2584215.6235691.2	LCQQKSGSRQEKLFFGNGTKLSVLENLNQVTLPKVAVFEPSE	TRBD1	TRBV7	11
TRBJ1-5	ERR2584215.1853572.1	SINQTSLYLCASSGPWASNQPQHFGEGTRLSVLENLNQVTLP	ND	TRBV27	13
	ERR2584215.6230389.1	AVYFCASSQVGSGQPQHFGEGTRLSVLENLNQVTLPKVAVF	TRBD1	TRBV3	12
	ERR2584215.8958509.2	VYFCASSQDELGLPQHFGEGTRLSVLENLNQVTLPKVAVFEP	TRBD2	ND	12
	ERR2584215.14361685.2	NETFSTLTVTSAHPADSSLYFCSASLAWDQPQHFGEGTRLSV	ND	TRBV20-8	11
TRBJ1-6	ERR2584214.3887545.1	NQTSLYLCASSESIGFTYNSPLYFGPGTRLTVTENLNQVTL	ND	TRBV27	15
	ERR2584215.14201941.2	SAHPADSSLYFCSASDFWGYNSPLYFGPGTRLTVTENLNQVT	TRBD2	TRBV20-8	13
	ERR2584215.12557074.1	TEPRDSAVYLCASREGTAPDNSPLYFGPGTRLTVTENLNQVT	TRBD1	TRBV12-7	14
	ERR2584214.1300918.1	YLCAIRDTNLNSPLYFGPGTRLTVTENLNQVTLPKVAVFEPS	ND	ND	12
	ERR2584215.7886314.1	ELNVSFLELTDSALYLCASPNTENSPLYFGPGTRLTVTENLN	ND	TRBV5-15	11
	ERR2584215.5072991.1	DSGLYFCSARLQQANSPLYFGPGTRLTVTENLNQVTLPKVA	TRBD1	TRBV20-3	11
	ERR2584214.7351628.1	SQTSVYFCASSISAENSPLYFGPGTRLTVTENLNQVTLPKVA	ND	ND	12
	ERR2584215.14277111.1	SALYFCASSGARQHFPQSYSPLYFGPGTRLTVTENLNQVTLP	ND	TRBV21	17
	ERR2584214.10497834.2	SLYFCSARQQQDSPLYFGPGTRLTVTENLNQVTLPKVAVFE	TRBD1	TRBV20-8	11
	ERR2584214.2903300.1	HSELEDSGVYFCASREGQQDSPLYFGPGTRLTVTENLNQVAP	TRBD1	TRBV14-3	12
	ERR2584215.12862957.2	IKSTEPGDSALYFCASSESVQGSSPLYFGPGTRLTVTENLNQ	ND	TRBV21	13
	ERR2584215.5179252.1	EGTFSTLKVQHSELEDSGVYFCASSQANSPLYFGPGTRLTVT	ND	TRBV14-3	10
	ERR2584215.6683808.2	KSTEPGDSALYFCASSESLVSPLYFGPGTRLTVTENLNQVTL	ND	TRBV21	11
	ERR2584214.8468827.1	FTLILESASTNQTSVYLCASSFGQQRSPLYFGPGTRLTVTEN	TRBD1	TRBV28	12
	ERR2584214.2812317.2	ATTKQTSLYLCASSKSSVTAGSPLYFGPGTRLTVTENLNQVT	TRBD1	TRBV8-3	14
	ERR2584214.2156438.1	FCSYRDSIGSPLYFGPGTRLTVTENLNQVTLPKVAVFEPSEA	TRBD1	ND	11
	ERR2584215.2075313.2	STLKIQRAEQRDSAVYLCASSSTAAANSPLYFGPGTRLTVTE	ND	TRBV7-7	13
	ERR2584215.2037427.2	VYFCASSFQQADNSPLYFGPGTRLTVTENLNQVTLPKVAVFE	TRBD1	TRBV28	13
	ERR2584215.254384.1	KSTEPGDSALYFCASSDSAGVLGSPLYFGPGTRLTVTENLNQ	TRBD1	TRBV21	14
TRBJ2-1	ERR2584215.10287415.1	ASPSQTSLYLCASSWPEGISYNELFFGPGTRLTVLENLNQVT	ND	TRBV25	14
	ERR2584215.5093187.1	LELKDSALYLCASSHIPGGSSYNELFFGPGTRLTVLENLNQV	TRBD2	TRBV5-13	15
	ERR2584214.9963709.1	MSVHPADSGLYFCSASDLLGSYNELFFGPGTRLTVLENLNQ	TRBD2	TRBV20-3	13
	ERR2584214.8736314.2	LYFCSARAASSYNELFFGPGTRLTVLENLNQVTLPKVAVFEP	ND	ND	12
	ERR2584214.6427625.2	EPGDSALYFCASSESSSYNELFFGPGTRLTVLENLNQVTLP	ND	TRBV21	12
	ERR2584214.3816941.2	LEDSGVYFCASSQVRLGGGGSSYNELFFGPGTRLTVLENLN	TRBD2	TRBV14	18
	ERR2584214.305721.2	FPLTLESATPSQTSVYFCASRDWDSYNELFFGPGTRLTVLE	TRBD2	TRBV6-6	12
	ERR2584215.11905948.2	GDSAVYFCASSQAGALSYNELFFGPGTRLTVLENLNQVTLP	TRBD1	TRBV3-3	14
	ERR2584215.7229228.2	GDSALYFCASSENWGGSYNELFFGPGTRLTVLENLNQVTLPK	TRBD2	TRBV21	14
	ERR2584215.2638541.1	FCSASDRVKAYNELFFGPGTRLTVLENLNQVTLPKVAVFEPS	ND	TRBV20	12
	ERR2584215.11663837.1	LCASSAGTAPYNELFFGPGTRLTVLENLNQVTLPKVAVFEPS	TRBD2	TRBV5-4	12
	ERR2584215.9783049.1	PADSSLYFCSARAGLYNELFFGPGTRLTVLENLNQVTLPKVA	TRBD2	TRBV20-8	11
	ERR2584215.7161241.1	CASSLGGDYNELFFGPGTRLTVLENLNQVTLPKVAVFEPSEA	TRBD2	ND	12
	ERR2584215.6818178.2	LCASSTDWGATYNELFFGPGTRLTVLENLNQVTLPKVAVFEP	TRBD2	ND	13
	ERR2584214.170459.1	SASTNQTSVYLCASSFLGTKYNELFFGPGTRLTVLENLNQVT	TRBD2	TRBV28	13
	ERR2584215.1859022.2	FPLTLESVSTKQTSLYLCASSETHNELFFGPGTRLTVLENL	ND	TRBV8-5	10
	ERR2584215.6535782.1	SSLEPGDSAVYFCASSRTGDSPNNELFFGPGTRLTVLENLNQ	TRBD1	TRBV3-3	14
	ERR2584214.7367977.2	IRSPGVGDSAVYLCASRDRDSGDNELFFGPGTRLTVLENLNQ	TRBD1	TRBV15-5	13
	ERR2584214.4181896.1	SPSQTSLYLCATGGTALDNNELFFGPGTRLTVLENLNQVTL	TRBD1	TRBV25	13
	ERR2584214.4073436.2	LHVSSLEPGDSAVYFCASSQDLWGGDNELFFGPGTRLTVLEN	TRBD2	TRBV3-3	14
	ERR2584214.3850985.1	DSSLYFCSAREVDWVNNELFFGPGTRLTVLENLNQVTLPKVA	TRBD2	TRBV20-8	13
	ERR2584214.2765702.1	EDSGVYFCASSRLGGNNELFFGPGTRLTVLENLNQVTLPKVA	TRBD2	TRBV14	12
	ERR2584215.4781634.2	LYFCSALGIRDNSFNELFFGPGTRLTVLENLNQVTLPKVAVF	TRBD2	TRBV20	14
	ERR2584215.11864801.1	SVLELVDSALYLCASSSQPGGVNELFFGPGTRLTVLENLNQX	TRBD2	TRBV5	12
	ERR2584215.8021806.1	DSALYFCASSKGLGGGLNELFFGPGTRLTVLENLNQVTLPK	TRBD2	ND	14
	ERR2584215.5326683.1	ASSLGGGPNELFFGPGTRLTVLENLNQVTLPKVAVFEPSEAE	TRBD2	ND	12
	ERR2584215.14580234.1	SLYFCSALTDWVRREDNELFFGPGTRLTVLENLNQVTLPKVA	TRBD2	TRBV20-8	15
	ERR2584215.13599969.2	LCASSQTGTGGRELFFGPGTRLTVLENLNQVTLPKVAVFEPS	TRBD2	ND	13
	ERR2584215.12523039.2	ALYFCAETDRDSNNELFFGPGTRLTVLENLNQVTLPKVAVFE	TRBD1	TRBV21	12
	ERR2584215.11242762.2	AHPADSSLYFCGARMDGFWNELFFGPGTRLTVLENLNQVTLP	ND	TRBV20-8	12
	ERR2584215.10728464.2	VTSAHPADSSLYFCSLRNYSVWYPPNELFFGPGTRLTVLENL	ND	TRBV20-8	14
	ERR2584215.10503544.2	GVYFCASSPTAIWNELFFGPGTRLTVLENLNQVTLPKVAVF	TRBD1	TRBV14	12
	ERR2584215.10054398.2	SSELNVSILELTDSALYLCASSFGTGVGELFFGPGTRLTVLE	TRBD2	TRBV5-19	12
	ERR2584215.9482543.2	SVYLCASSFIGARELFFGPGTRLTVLENLNQVTLPKVAVFEX	ND	TRBV28	11
	ERR2584215.8669887.1	FCSASQNTEELFFGPGTRLTVLENLNQVTLPKVAVFEPSEA	ND	TRBV20	10
	ERR2584215.8267859.1	TSPEDSSFYFCSADWGVGDNELFFGPGTRLTVLENLNQVTLP	TRBD2	TRBV29	12
	ERR2584215.6788466.2	SAHPADSSLYFCSARRDSRSNELFFGPGTRLTVLENLNQVTL	TRBD1	TRBV20-8	12
	ERR2584215.6172157.1	YLCASSSEGLGGAELFFGPGTRLTVLENLNQVTLPKVAVFE	TRBD2	ND	13
	ERR2584215.6044309.2	SGVYFCASSTQMTADELFFGPGTRLTVLENLNQVTLPKVAVF	TRBD1	TRBV14	12
	ERR2584215.5908057.1	VLELKDSALYLCASSSPGDWVYQELFFGPGTRLTVLENLNQ	TRBD2	TRBV5-13	14
	ERR2584215.5593650.2	NVSFLELTDSALYLCASSVAWAADELFFGPGTRLTVLENLN	ND	TRBV5-15	12
	ERR2584215.5075759.2	VLELVDSALYLCASSWDSELFFGPGTRLTVLENLNQVTLPK	TRBD1	TRBV5-2	9
TRBJ2-2	ERR2584215.11150243.2	LNVSVLELKDSALYLCASSTGTANTGQLFFGDGSKLTVLENL	TRBD2	TRBV5-13	13
	ERR2584215.11007463.1	LEPGDSAVYFCASSQSQGSGQLFFGDGSKLTVLENLNQVTLP	ND	TRBV3-3	12
	ERR2584215.7604665.2	DSAVYLCASAPSTGQLFFGDGSKLTVLENLNQVTLPKVAVF	ND	ND	10
	ERR2584215.7228847.1	SELEDSGVYFCASSQDLFQLSGQLFFGDGSKLTVLENLNQVT	ND	TRBV14-3	14
	ERR2584215.5401759.2	EPRDSAVYLCASSFGSNRTGQLFFGDGSKLTVLENLNQVTL	ND	ND	13
TRBJ2-3	ERR2584215.9918430.2	TEPGDAAVYLCASSLSTDPQYFGQGTRLTVLENLNQVTLPK	ND	TRBV12-2	10
	ERR2584215.6737169.1	IKSTEPGDSALYFCASNEGALSTDPQYFGQGTRLTVLENLN	ND	TRBV21	13
	ERR2584214.3201075.2	KIQPAELEDSGVYFCASSQDRGASTDPQYFGQGTRLTVLENL	ND	TRBV14-4	14
	ERR2584215.7777451.1	CASSSISQAGTDPQYFGQGTRLTVLENLNQVTLPKVAVFEPS	TRBD1	ND	14
	ERR2584215.7411404.1	SALYLCASSPNGGWGTDPQYFGQGTRLTVLENLNQVTLPKVA	TRBD2	ND	14
	ERR2584215.4707728.2	VTSAHPADSSLYFCSASRPAGTDPQYFGQGTRLTVLENLNQV	TRBD1	TRBV20-8	12
	ERR2584214.10419365.1	PGDSAVYFCASSPGLGGTDPQYFGQGTRLTVLENLNQVTLP	TRBD2	TRBV3	13
	ERR2584214.1681413.2	LESASTNQTSVYLCASSPGLKSVGTDPQYFGQGTRLTVLENL	TRBD2	TRBV28	15
	ERR2584215.12967007.1	DSALYFCASSHGTTVTDPQYFGQGTRLTVLENLNQVTLPKVA	TRBD1	ND	13
	ERR2584215.5528330.1	SATPSQTSVYFCASSFGTATLTDPQYFGQGTRLTVLENLNQ	TRBD1	ND	14
	ERR2584215.3165024.2	GDSALYFCASSERQYTDPQYFGQGTRLTVLENLNQVTLPKV	ND	TRBV21	12
	ERR2584215.1189145.1	AHPADSSLYFCSAFDSHTDPQYFGQGTRLTVLENLNQVTLPK	TRBD1	TRBV20-8	11
	ERR2584215.14140525.2	IRSPGMGDSAVYLCASRRDITTDPQYFGQGTRLTVLENLNQV	TRBD1	TRBV15-2	12
	ERR2584215.13888795.2	GDSALYFCASSEGTTDPQYFGQGTRLTVLENLNQVTLPKVAV	ND	TRBV21	11
	ERR2584215.13712818.1	LVDSALYFCASSSYIGGADPQYFGQGTRLTVLENLNQVTLPK	TRBD2	TRBV5-7	13
	ERR2584215.12361530.2	PADSSLYFCSASDSALQRDPQYFGQGTRLTVLENLNQVTLPK	ND	TRBV20-8	13
	ERR2584215.11986931.2	GDSALYFCASNRLGGGADPQYFGQGTRLTVLENLNQVTLPKV	TRBD2	TRBV21	13
	ERR2584215.9719744.1	EPGDSAVYFCASSQENGGWSSPDPQYFGQGTRLTVLENLNQ	TRBD2	TRBV3	16
	ERR2584215.8882886.1	VTSAHPADSSLYFCSAQKTGFRDPQYFGQGTRLTVLENLNQ	ND	TRBV20-8	12
	ERR2584215.4615614.1	AHPADSSLYFCSANRAMVGDPQYFGQGTRLTVLENLNQVTLP	ND	TRBV20-8	12
	ERR2584215.838654.2	LYFCSAARRDWATLDPQYFGQGTRLTVLENLNQVTLPKVAVF	TRBD2	ND	14
TRBJ2-4	ERR2584215.10207655.2	ADSSLYFCSVHYFGGGGSSQNTQYFGPGTRLSVLENLNQVT	TRBD2	TRBV20-8	16
	ERR2584215.9108583.2	QRAEQGDSALYLCASSEGLGSQNTQYFGPGTRLSVLENLNQG	TRBD2	TRBV7-7	13
	ERR2584215.8441231.1	ELTDSALYLCASSVERSPSQNTQYFGPGTRLSVLENLNQVT	ND	TRBV5	14
	ERR2584214.8950292.2	FCASSYGTGGSSQNTQYFGPGTRLSVLENLNQVTLPKVAVF	TRBD2	ND	15
	ERR2584215.14065392.1	IKSTEPGDSALYFCASMEGRGQNTQYFGPGTRLSVLENLNQ	ND	TRBV21	12
	ERR2584215.11501848.2	IRSPGVGDSAVYLCASIIRGQNTQYFGPGTRLSVLENLNQVT	ND	TRBV15-5	11
	ERR2584215.8361621.2	IKSTEPGDSALYFCASSEPTGGWNQNTQYFGPGTRLSVLENL	TRBD2	TRBV21	15
	ERR2584215.4571116.2	LCASSQAGGALGAQNTQYFGPGTRLSVLENLNQVTLPKVAVF	TRBD2	ND	16
	ERR2584215.3087465.2	VSFLELTDSALYLCASSVYGSMGDQNTQYFGPGTRLSVLENL	ND	TRBV5-15	15
	ERR2584215.13374681.2	LGDSAMYFCASSLLRDGKNTQYFGPGTRLSVLENLNQVTLPK	TRBD1	TRBV11-4	13
	ERR2584215.11875284.1	LYLCASSLGWKNTQYFGPGTRLSVLENLNQVTLPKVAVFEPS	TRBD2	ND	11
	ERR2584215.6479575.1	VTSAHPADSSLYFCSAHQTAGENTQYFGPGTRLSVLENLNQ	TRBD1	TRBV20-8	12
	ERR2584215.6244916.1	GDSAVYLCASTGGWKNTQYFGPGTRLSVLENLNQVTLPKVA	TRBD2	ND	11
	ERR2584215.4148127.1	QGDSALYLCASHSRDWAKNTQYFGPGTRLSVLENLNQVTLPK	TRBD2	TRBV7	13
	ERR2584215.13980996.2	DSSLYFCSASRGETNTQYFGPGTRLSVLENLNRVTLPKVAV	ND	TRBV20-8	11
	ERR2584215.8664474.2	EIKSTEPGDSALYFCASSEMDSGGNTQYFGPGTRLSVLENL	TRBD1	TRBV21	13
	ERR2584214.6049687.1	SQTSVYFCASSQGLGAINTQYFGPGTRLSVLENLNQVTLPKV	TRBD2	ND	13
	ERR2584214.3577145.2	SATTKQTSLYLCASSDRSGTRGNTQYFGPGTRLSVLENMNQV	TRBD2	TRBV8-3	14
	ERR2584214.1140627.2	ENFTLILESASTNQTSVYLCASLPFGGNTQYFGPGTRLSVLE	TRBD2	TRBV28	11
	ERR2584215.10238572.1	SALYLCASSVDPGGGRNTQYFGPGTRLSVLENLNQVTLPKVA	TRBD2	ND	14
	ERR2584215.562196.1	CASSSRDSMLVNTQYFGPGTRLSVLENLNQVTLPKVAVFEPS	TRBD1	ND	14
	ERR2584214.10084567.1	TVTSAHPADSSLYFCSASEWGVVIPNTQYFGPGTRLSVLEN	TRBD2	TRBV20-8	14
	ERR2584214.7551770.2	HPADSSLYFCSAETKGVVNTQYFGPGTRLSVLENLNQVTLPK	TRBD2	TRBV20-8	12
	ERR2584214.6930717.1	LKIQPAELEDSGVYFCASSQDPGRNTQYFGPGTRLSVLENLN	ND	TRBV14-4	12
	ERR2584214.4806095.1	FSTLKIQRTEPGDAAVYLCASSSEWNTQYFGPGTRLSVLENL	ND	TRBV12-2	10
	ERR2584215.14517015.1	IQRTEPGDAAVYLCASSLASDRDTQYFGPGTRLSVLENLNQV	ND	TRBV12-2	12
	ERR2584215.14350015.1	ASTNQTSVYLCASSSLGGGVDTQYFGPGTRLSVLENLNQVTL	TRBD2	TRBV28	13
	ERR2584215.13489527.2	LCASSARTGSLDTQYFGPGTRLSVLENLNQVTLPKVAVFEPS	TRBD2	ND	13
	ERR2584215.12776783.1	LEDSGVYFCASSQGLGYTQYFGPGTRLSVLENLNQVTLPKVA	TRBD2	TRBV14	11
	ERR2584215.11946259.1	SATPSQTSVYFCASSSGTGGLVDTQYFGPGTRLSVLENLNQV	TRBD2	ND	14
	ERR2584215.9176878.2	FTLILESASTNQTSVYLCASSSGTGSNTQYFGPGTRLSVLEN	TRBD2	TRBV28	12
	ERR2584215.7766923.2	PADSGLYFCSASDGPGAQYFGPGTRLSVLENLNQVTLPKVAV	ND	TRBV20-3	10
	ERR2584215.6630044.2	STLKIQRTEPGDAAVYLCASSSPISSQNTQYFGPGTRLSVLE	ND	TRBV12-2	13
	ERR2584215.2416324.1	PGVGDSAVYLCASRSFYQGDWRDTQYFGPGTRLSVLENLNQV	TRBD2	TRBV15	15
	ERR2584214.10525050.2	VTSAHPADSSLYFCSATNLVDGTQYFGPGTRLSVLENLNQVT	ND	TRBV20-8	11
	ERR2584214.9613595.2	LTLESATPSQTSVYFCASSTGGRDTQYFGPGTRLSVLENLNQ	TRBD2	ND	11
	ERR2584214.6958502.2	CASRAAGGGDSQYFGPGTRLSVLENLNQVTLPKVAVFEPSEA	TRBD2	ND	12
TRBJ2-5	ERR2584215.5586841.2	SQTSVYFCASSYARTSETQYFGPGTRLFVLENLNQVTLPKVA	ND	ND	12
	ERR2584215.14478789.1	NVSFLELTDSALYLCASSPVLGASETQYFGPGTRLFVLENLN	TRBD2	TRBV5-15	13
	ERR2584215.3721488.2	ALYLCASSAFSAASETQYFGPGTRLFVLENLNQVTLPKVAV	ND	ND	12
	ERR2584214.4756335.2	QTSVYFCATGTPSETQYFGPGTRLFVLENLNQVTLPKVAVF	TRBD2	ND	10
	ERR2584215.9311983.2	SQTSLYLCASSSGTGGSAVSETQYFGPGTRLFVLENLNQVTL	TRBD2	TRBV25	16
	ERR2584215.6921087.1	DSALYLCASSPGAGGSETQYFGPGTRLFVLENLNQVTLPKVA	TRBD2	ND	13
	ERR2584214.886950.1	SASTNQTSVYLCASSSGTGGSETQYFGPGTRLFVLENLNQVT	TRBD2	TRBV28	13
	ERR2584215.10850989.1	QGDSALYLCAGGVSTETQYFGPGTRLFVLENLNQVTLPKVA	TRBD2	TRBV7	10
	ERR2584214.4352188.1	SASTNQTSVYLCASSPTGTETQYFGPGTRLFVLENLNQVTLP	TRBD1	TRBV28	11
	ERR2584214.9048153.1	TDSALYLCASSPTGLGETQYFGPGTRLFVLENLNQVTLPKVA	TRBD2	TRBV5	12
	ERR2584215.5316089.1	SAHPADSSLYFCSASGRSEETQYFGPGTRLFVLENLNQVTLP	ND	TRBV20-8	11
	ERR2584214.5403963.1	SSLEPGDSAVYFCASSPTTGREETQYFGPGTRLFVLENLNQ	TRBD2	TRBV3-3	13
TRBJ2-6	ERR2584215.9570396.2	LCASSHSTAESKLSGADQTFGAGSRLTVVENLNQVTLPKVAV	TRBD1	ND	17
	ERR2584215.14374575.2	CASSFSRSAGADQTFGAGSRLTVVENLNQVTLPKVAVFEPSE	ND	ND	13
	ERR2584215.13679992.2	KDSALYLCASSSAGTGKSGADQTFGAGSRLTVVENLNQVTLP	TRBD2	TRBV5-13	15
	ERR2584215.12454544.1	TEPGDAAVYLCASSLYWAGADQTFGAGSRLTVVENLNQVTLP	ND	TRBV12-2	12
	ERR2584215.8509104.1	SGVYFCASSQVIPLGSRAGADQTFGAGSRLTVVENLNQVTLP	TRBD2	TRBV14	17
	ERR2584215.7859931.1	AHPADSSLYFCGASRQASGADQTFGAGSRLTVVENLNQVTLP	ND	TRBV20-8	12
	ERR2584215.5301312.1	STEPGDSALYFCASSESFGARGADQTFGAGSRLTVVENLNQV	TRBD2	TRBV21	14
	ERR2584214.10896616.2	GDSALYFCASSEGLGSGADQTFGAGSRLTVVENLNQVTLPKV	TRBD2	TRBV21	13
	ERR2584214.10146779.2	AVYFCASSDQRTGADQTFGAGSRLTVVENLNQVTLPKVAVFE	ND	ND	12
TRBJ2-7	ERR2584215.13936092.2	VLELVDSALYFCASSSGLGGLISYEQYFGSGTKLTVIENLNQ	TRBD2	TRBV5-7	15
	ERR2584215.13659826.2	TVTSAHPADSSLYFCSASELGHSLSYEQYFGSGTKLTVIEN	TRBD2	TRBV20-8	13
	ERR2584215.12958167.2	LCASSPHGALSYEQYFGSGTKLTVIENLNQVTLPKVAVFEPS	ND	ND	13
	ERR2584215.9937708.1	SALYLCASSSAPQASSYEQYFGSGTKLTVIENLNQVTLPKVA	ND	ND	14
	ERR2584214.9412566.2	SVLELVDSALYLCASGNRSYEQYFGSGTKLTVIENLNQVTLP	ND	TRBV5	10
	ERR2584214.7202772.2	SVSVLELVDSALYFCASSFGGFSSYEQYFGSGTKLTVIENL	TRBD2	TRBV5-7	13
	ERR2584214.5739592.2	SASTNQTSVYLCASSWGLDTSYEQYFGSGTKLTVIENLNQVT	TRBD2	TRBV28	13
	ERR2584215.14356396.1	TDSALYLCASSLETGWGEQYFGSGTKLTVIENLNQVTLPKVA	TRBD2	TRBV5	12
	ERR2584215.13204530.2	AVYLCASSPTVSPYEQYFGSGTKLTVIENLNQVTLPKVAVFE	ND	ND	12
	ERR2584215.12959468.2	CSARLLWQHYEQYFGSGTKLTVIENLNQVTLPKVAVFEPSGA	ND	ND	12
	ERR2584215.12517972.2	VTSAHPADSSLYLCGAEGSGVGYEQYFGSGTKLTVIENLNQV	TRBD2	TRBV20-8	12
	ERR2584215.11854303.2	FCASSLMGGGRYYEQYFGSGTKLTVIENLNQVTLPKVAVFEP	TRBD2	ND	14
	ERR2584215.10129724.1	TDSALYLCASSYRLGAIYEQYFGSGTKLTVIENLNQVTLPKV	TRBD2	TRBV5	13
	ERR2584215.9850438.2	TILELTDSALYLCASGLSGATYEQYFGSGTKLTVIENLNQVT	TRBD2	TRBV5-12	12
	ERR2584215.9186054.2	SLYFCGASEKTSSKEQYFGSGTKLTVIENLNQVTLPKVAVFE	ND	ND	12
	ERR2584215.9070024.2	FSTLKVQHSELEDSGVYFCASSQDWGLGEQYFGSGTKLTVIE	TRBD2	TRBV14-3	12
	ERR2584215.8960543.2	CSASDYSAALGYEQYFGSGTKLTVIENLNQVTLPKVAVFEPS	TRBD2	TRBV20	14
	ERR2584215.8392613.2	GVYFCASRQPGRDEQYFGSGTKLTVIENLNQVTLLKVAVFEP	ND	TRBV14	11
	ERR2584215.8017127.2	AVYFCASSNDWGVDEQYFGSGTKLTVIENLNQVTLPKVAVFE	TRBD2	ND	12
	ERR2584215.6728414.1	ALYFCASAGSGYEQYFGSGTKLTVIENLNQVTLPKVAVFEPS	ND	ND	10
	ERR2584215.5162342.2	QPVQLGDSAVYLCASTSGMGALTYEQYFGSGTKLTVIENLNQ	ND	TRBV2-2	14
	ERR2584215.4812442.2	STLKIQRAEQRDSAVYLCASSKYWGDEYEQYFGSGTKLTVIE	TRBD2	TRBV7-7	13
	Figure S3. The TRB clonotypes recovered from the RNA-seq dataset grouped based on the different TRBJ genes. The NCBI ID number and the predicted amino acid sequences are reported. The classification of the TRBD and TRBV genes of each clone, when present, are listed on the right together with the CDR3 length. The CDR3-IMGT sequence, defined as the region starting at the codon after the last cystei…
