# Supplementary material for: A Comprehensive Analysis of the Genomic and Expressed Repertoire of the T Cell Receptor Beta Chain in <em>Equus caballus</em>
Source: Preprints.org preprint supplement (doi:10.20944/preprints202408.0599.v1), 2024-08-08
Supplement: Supplementary file 2 [file Figure S1(B-D) .pdf › Supplementary Files/Figure S1(B-D) .pdf]

(B)

| TRBD<br>gene name | 5'D-NONAMER<br><u>GGTTTTTGT</u> | 5'D-SPACER   | 5'D-HEPTAMER<br><u>CACTGTG</u> | D-REGION                                                 | 3'D-HEPTAMER<br><u>CACAGTG</u> | 3'D-SPACER              | 3'D-NONAMER<br><u>ACAAAAACC</u> |
|-------------------|---------------------------------|--------------|--------------------------------|----------------------------------------------------------|--------------------------------|-------------------------|---------------------------------|
| TRBD1             | cgtttttgt                       | acaaagctgtaa | cattgtg                        | GGGACAGCAGGC<br>G T A G<br>G Q Q<br>D S R                | cacggtg                        | attcaactttatggacaaccttt | acaaaaacc                       |
| TRBD2             | cattttttga                      | atcatagtgtaa | cattgtg                        | GGGACTGGGGGGTGGAG<br>G T G G W<br>G L G G G<br>D W G V E | cacgatg                        | attcaggtaaaggaggtgctttt | acaaaaagc                       |

(C)

| TRBJ<br>gene name | Fct | J-NONAMER<br><u>GGTTTTGT</u> | J-SPACER     | J-HEPTAMER<br><u>CACTGTG</u> | J-REGION                                                                                           | 5'splice donor |
|-------------------|-----|------------------------------|--------------|------------------------------|----------------------------------------------------------------------------------------------------|----------------|
| TRBJ1-1           | F   | atttttctc                    | cttgcccatgt  | cactgtg                      | TGAACACTGAAGTCTTCTTCGGAGAAGGCACGAGGCTCACGGTTGTAG<br><u>N T E V F F G E G T R L T V V</u>           | gtaaga         |
| TRBJ1-2           | F   | cattttgga                    | gtggccgtattc | tgatgtg                      | TTAACATGACTATCACTTTGGCCCAGGAACAACTGACGGTCATAG<br><u>N Y D Y H F G P G T K L T V I</u>              | gtaagc         |
| TRBJ1-3           | F   | ggttttgaa                    | gggatctggga  | ggctgtg                      | CTTTGGAAACACCGTTGATTTTGGGGAGGGAAGCCGGCTCACTGTTGTAG<br><u>F G N T V D F G E G S R L T V V</u>       | gtaagc         |
| TRBJ1-4           | F   | cagttttct                    | accaggctttac | tgttgtg                      | TAACTAATGAAAACTATTTTTTCGGCAATGGAACCAAGCTCTCTGTCTTGG<br><u>T N E K L F F G N G T K L S V L</u>      | gtaagt         |
| TRBJ1-5           | F   | gggttttcc                    | acactcatgttg | tactgtg                      | GAGCAACCAGCCACAGCACTTTGGAGAGGGAACCTCGACTCTCTGTCCTAG<br><u>S N Q P Q H F G E G T R L S V L</u>      | gtaagg         |
| TRBJ1-6           | F   | ggttttagc                    | acagctgtctgc | agctgtg                      | TTCCTATAATTTCGCCGCTCTACTTTGGGCCCGGCACCAGGCTCACTGTCACAG<br><u>S Y N S P L Y F G P G T R L T V T</u> | gtatcg         |
| TRBJ2-1           | F   | gaattcttg                    | gcagccccttcc | cactgtg                      | CTCTTACAATGAGCTGTTCTTCGGGCCAGGGACTCGGCTCACTGTGCTAG<br><u>S Y N E L F F G P G T R L T V L</u>       | gtaaga         |
| TRBJ2-2           | F   | ggttgctc                     | ctgggtccccag | ggctgtg                      | CGAACACGGGGCAGCTGTTCTTTGGGGACGGTTCCAAGCTGACTGTGCTCG<br><u>N T G Q L F F G D G S K L T V L</u>      | gtaagg         |
| TRBJ2-3           | F   | ggtttttgt                    | cctggggctcgg | ggctgtg                      | AGTACAGACCCTCAATATTTTCGGCCAGGGCACCCGGCTGACCGTGCTAG<br><u>S T D P Q Y F G Q G T R L T V L</u>       | gtaagc         |
| TRBJ2-4           | F   | cgtttttgt                    | gctgcgcccggg | ggctgtg                      | AGCCAAAATACTCAGTACTTCGGCCCCGGTACTCGGCTGTCGGTGCTAG<br><u>S Q N T Q Y F G P G T R L S V L</u>        | gtaagc         |
| TRBJ2-5           | F   | ggtttttgc                    | gcggggctcggg | ggccgtg                      | ACCTCAGAGACGAGTACTTCGGGCCCGGCACGCGGCTCTTCGTGCTGG<br><u>T S E T Q Y F G P G T R L F V L</u>         | gtaagc         |
| TRBJ2-6           | F   | ggttttggg                    | cagaagctctgg | ggctgtg                      | CTTTCGGGCGCCGACCAGACTTTTCGGGGCCGGCAGCCGGCTGACCGTCGTGG<br><u>L S G A D Q T F G A G S R L T V V</u>  | gtgagt         |
| TRBJ2-7           | F   | ggtttacgt                    | gtggggcttggt | ctccgtg                      | CTCTTACGAGCAGTACTTCGGCTCCGGCACCAAGCTCACGGTCATAG<br><u>S Y E Q Y F G S G T K L T V I</u>            | gtaaga         |

(D)

|       |           | C-DOMAIN<br>[EX1]                                                                                                         |                                  |    |    |    |    |              |    |    |    |    |               |    |              |    |    |              |     |     |     |     |     |              |     |  |  |  |                |  |                |  |  |                |  |  |  |  |
|-------|-----------|---------------------------------------------------------------------------------------------------------------------------|----------------------------------|----|----|----|----|--------------|----|----|----|----|---------------|----|--------------|----|----|--------------|-----|-----|-----|-----|-----|--------------|-----|--|--|--|----------------|--|----------------|--|--|----------------|--|--|--|--|
|       |           | A<br>(1-15)                                                                                                               |                                  |    |    |    | AB | B<br>(16-26) |    |    |    |    | BC<br>(27-38) |    | C<br>(39-45) |    | CD | D<br>(77-84) |     |     |     |     | DE  | E<br>(85-96) |     |  |  |  | EF<br>(97-104) |  | F<br>(105-117) |  |  | G<br>(118-128) |  |  |  |  |
| TRBC  | gene name | Fct                                                                                                                       |                                  |    |    |    |    |              |    |    |    |    |               |    |              |    |    |              |     |     |     |     |     |              |     |  |  |  |                |  |                |  |  |                |  |  |  |  |
|       |           | 1                                                                                                                         | 10                               | 15 | 16 | 23 | 26 | 27           | 36 | 39 | 41 | 45 | 77            | 80 | 84           | 85 | 89 | 96           | 97  | 104 | 105 | 117 | 118 | 121          | 128 |  |  |  |                |  |                |  |  |                |  |  |  |  |
| TRBC1 | F         | (E)NLNQVTLPKVAVFEPSEAEISR...                                                                                              | 87654321 ..... .... 123 ..... .. | 16 | 23 | 26 | 27 | 36           | 39 | 41 | 45 | 77 | 80            | 84 | 85           | 89 | 96 | 97           | 104 | 105 | 117 | 118 | 121 | 128          |     |  |  |  |                |  |                |  |  |                |  |  |  |  |
|       |           | TEKATLVCLAT GFYP..DHVE LSWVNGKEVQT..GVSTDPQPYREQSDD.ENPSYCLSSRLRVSAFWH.NPRNHFR C QVQFFGL EN..DEWKE.NRTKPVRQNI SAEAWGRA... |                                  |    |    |    |    |              |    |    |    |    |               |    |              |    |    |              |     |     |     |     |     |              |     |  |  |  |                |  |                |  |  |                |  |  |  |  |
| TRBC2 | F         | (E)NLNQVTLPKVAVFEPSEAEISR...                                                                                              | 87654321 ..... .... 123 ..... .. | 16 | 23 | 26 | 27 | 36           | 39 | 41 | 45 | 77 | 80            | 84 | 85           | 89 | 96 | 97           | 104 | 105 | 117 | 118 | 121 | 128          |     |  |  |  |                |  |                |  |  |                |  |  |  |  |
|       |           | TEKATLVCLAT GFYP..DHVE LSWVNGKEVQT..GVSTDPQPYREQSDD.ENPSYCLSSRLRVSAFWH.NPRNHFR C QVQFFGL EN..DEWKE.NRTKPVRQNI SAEAWGRA... |                                  |    |    |    |    |              |    |    |    |    |               |    |              |    |    |              |     |     |     |     |     |              |     |  |  |  |                |  |                |  |  |                |  |  |  |  |

| CONNECTING-REGION |          |                   | TRANSMEMBRANE-REGION |          |        | CYTOPLASMIC-REGION |  |  |
|-------------------|----------|-------------------|----------------------|----------|--------|--------------------|--|--|
| {EX2}             |          |                   | {EX3}                |          |        | {EX4}              |  |  |
| TRBC1             | (D)CGLSS | (V)SYQRGVLSATILYE | ILLGKATLYAVLV        | SALVLMAM | VRRKDE |                    |  |  |
| TRBC2             | (D)CGLSS | (V)SYQRGVLSATILYE | ILLGKATLYAVLV        | SALVLMAM | VKKKDS |                    |  |  |
