# Supplementary material for: A Comprehensive Analysis of the Genomic and Expressed Repertoire of the T Cell Receptor Beta Chain in <em>Equus caballus</em>
Source: Preprints.org preprint supplement (doi:10.20944/preprints202408.0599.v1), 2024-08-08

7362 MODX

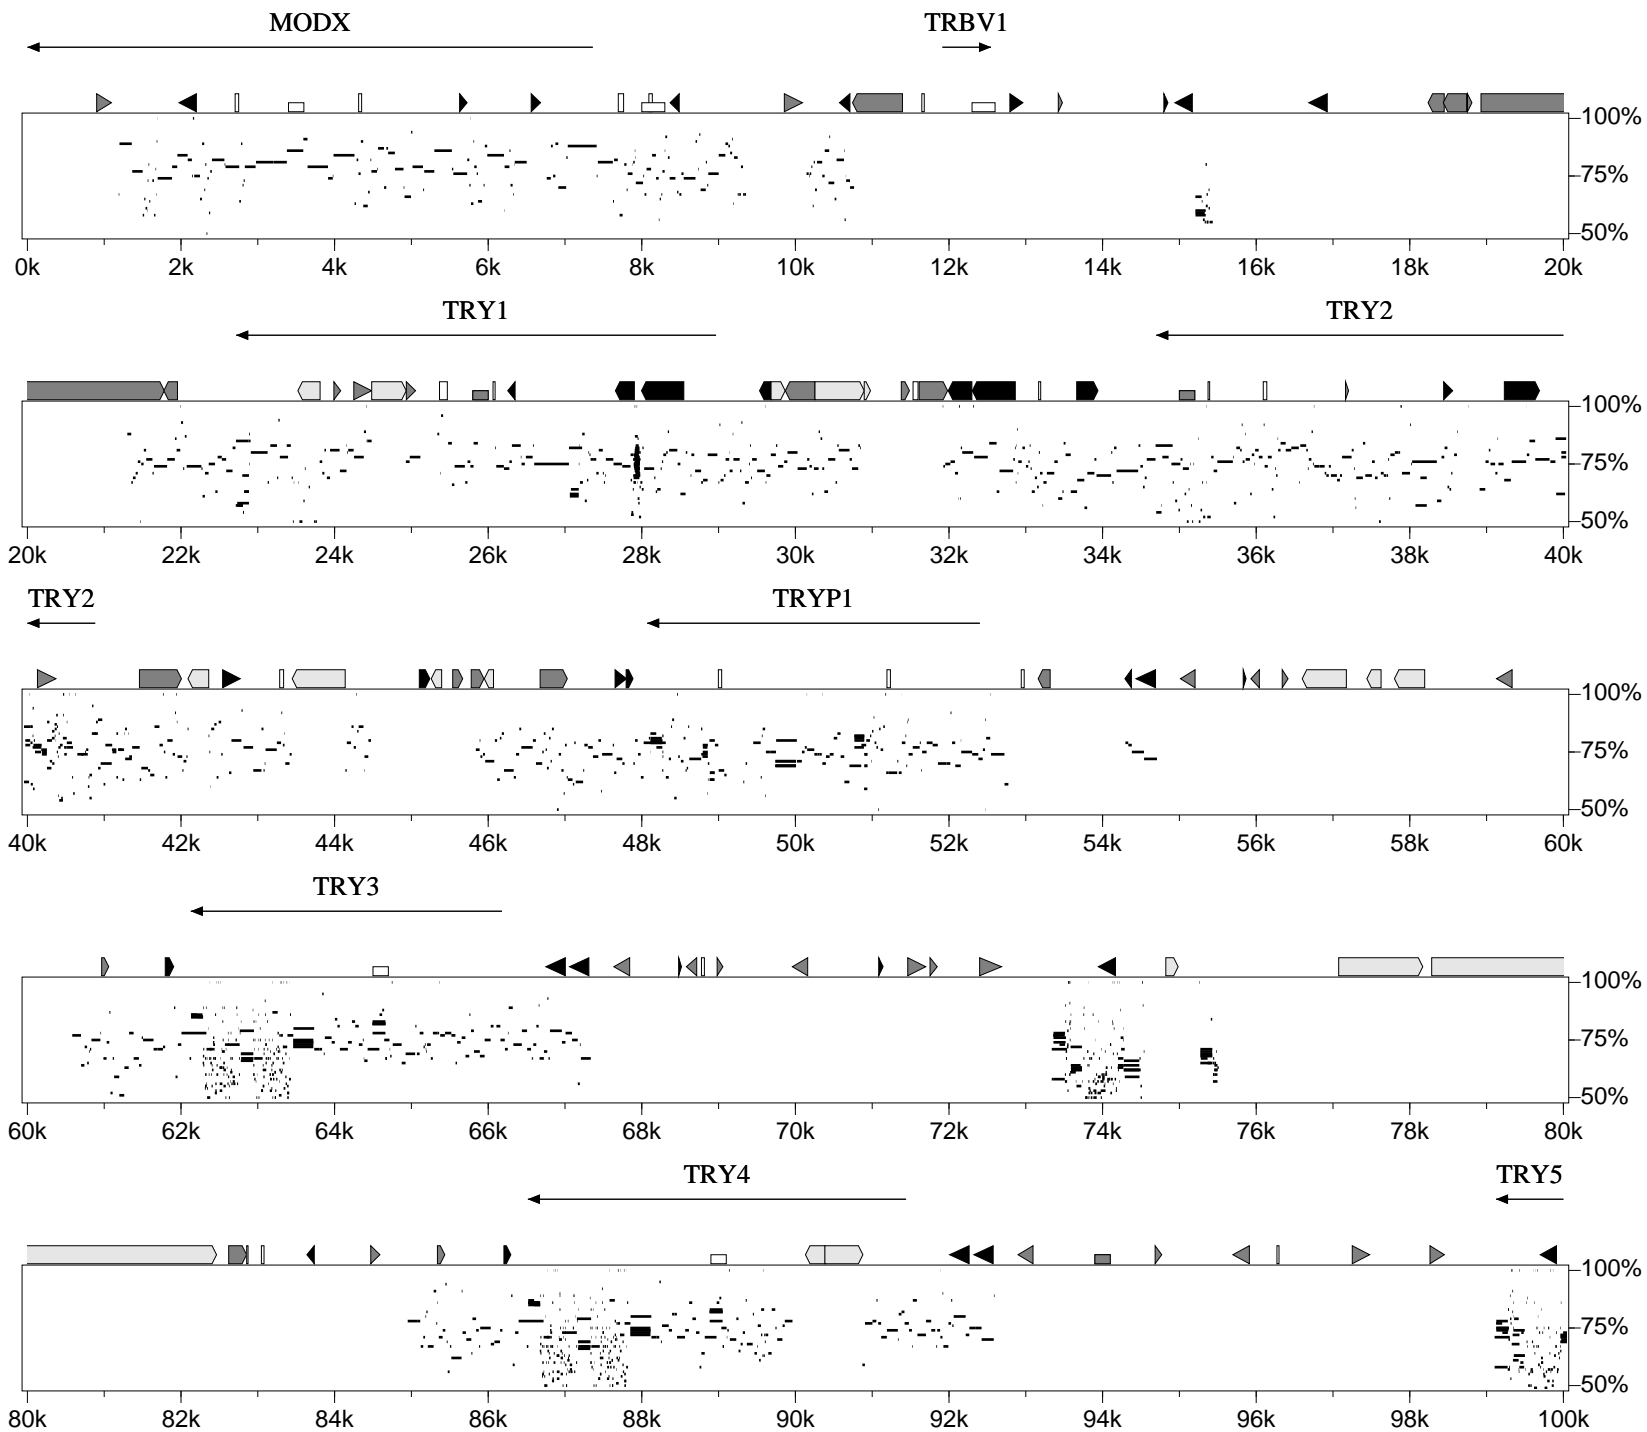

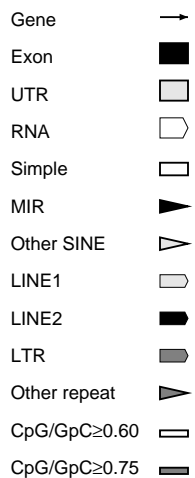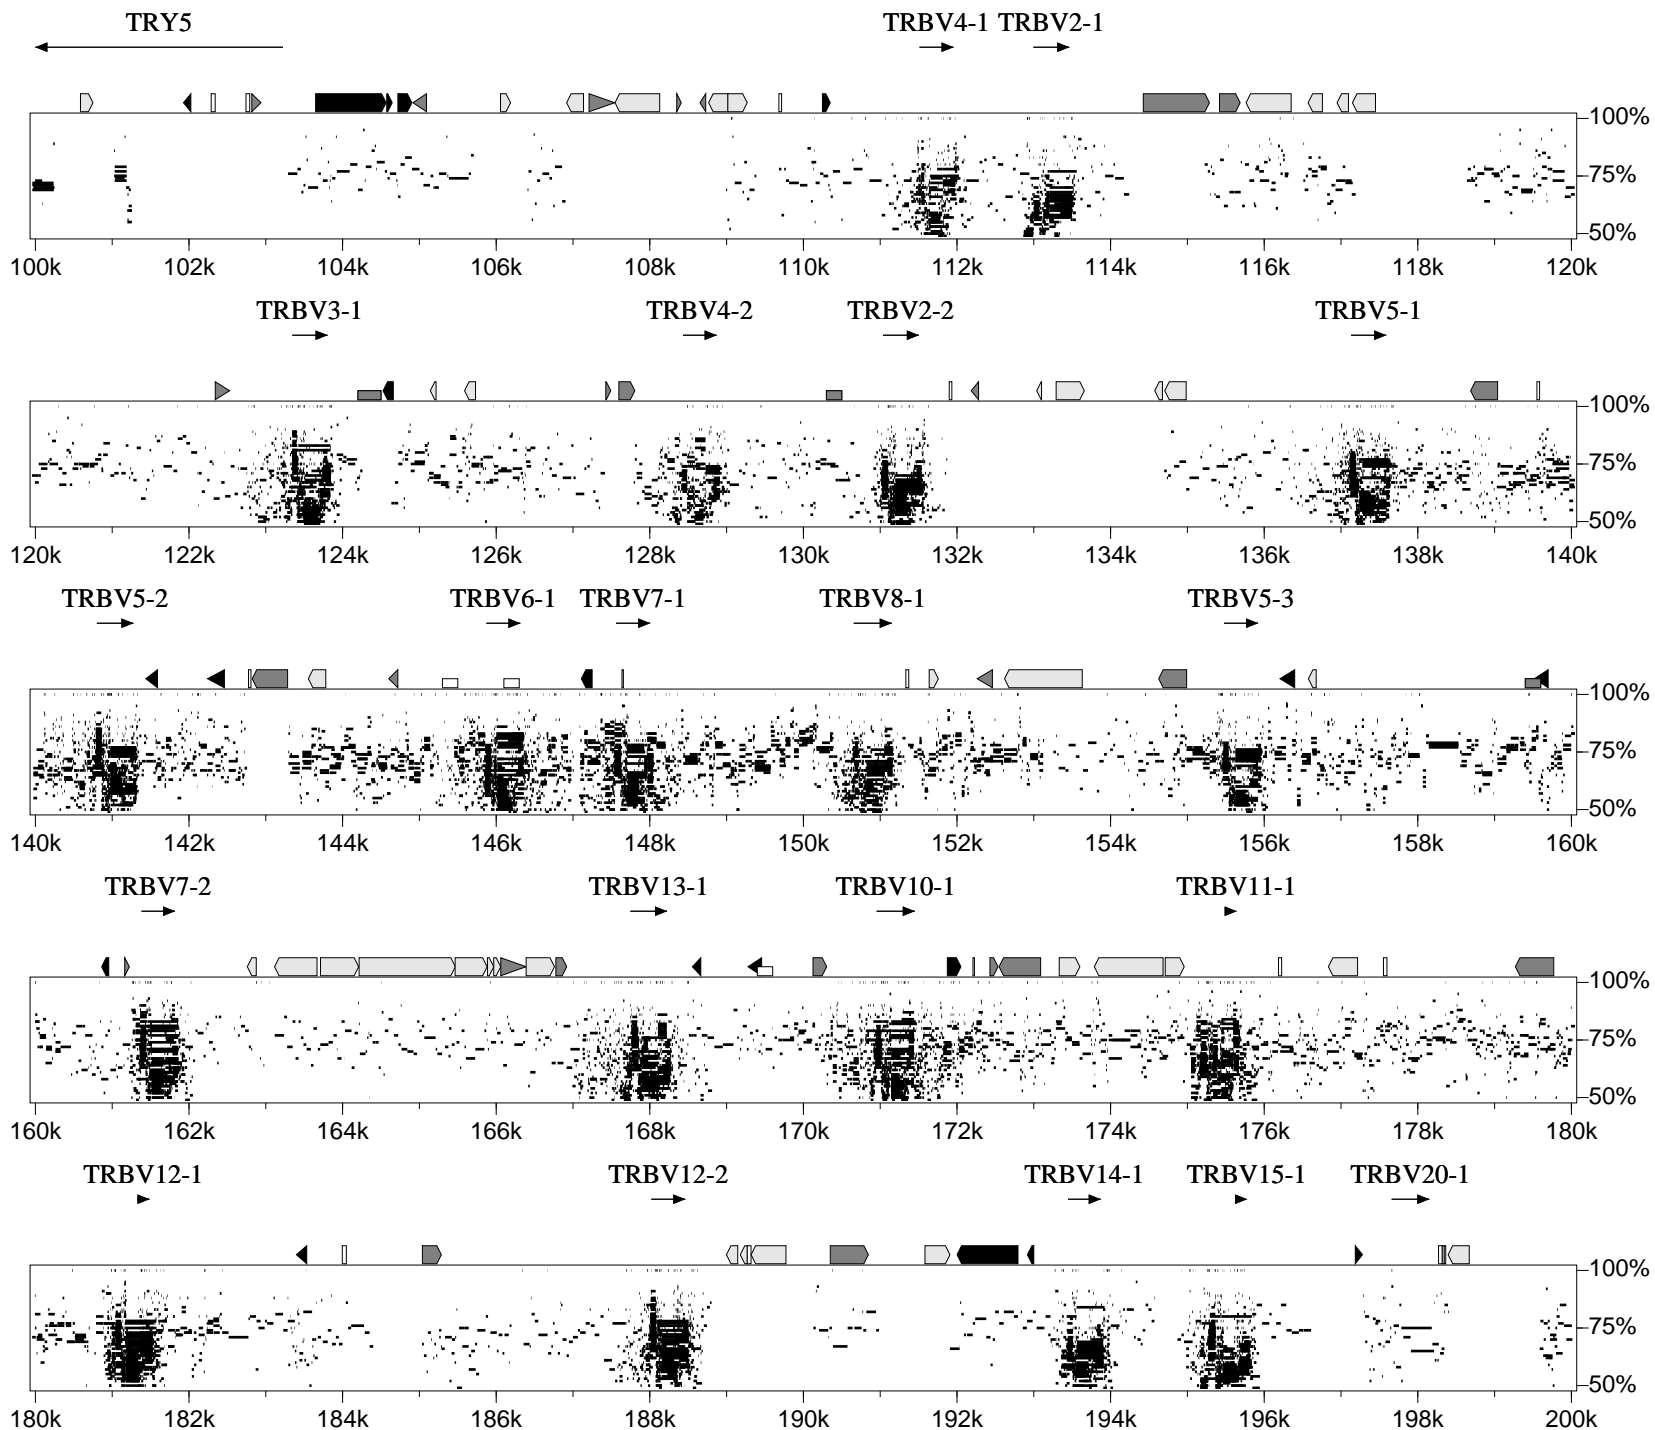

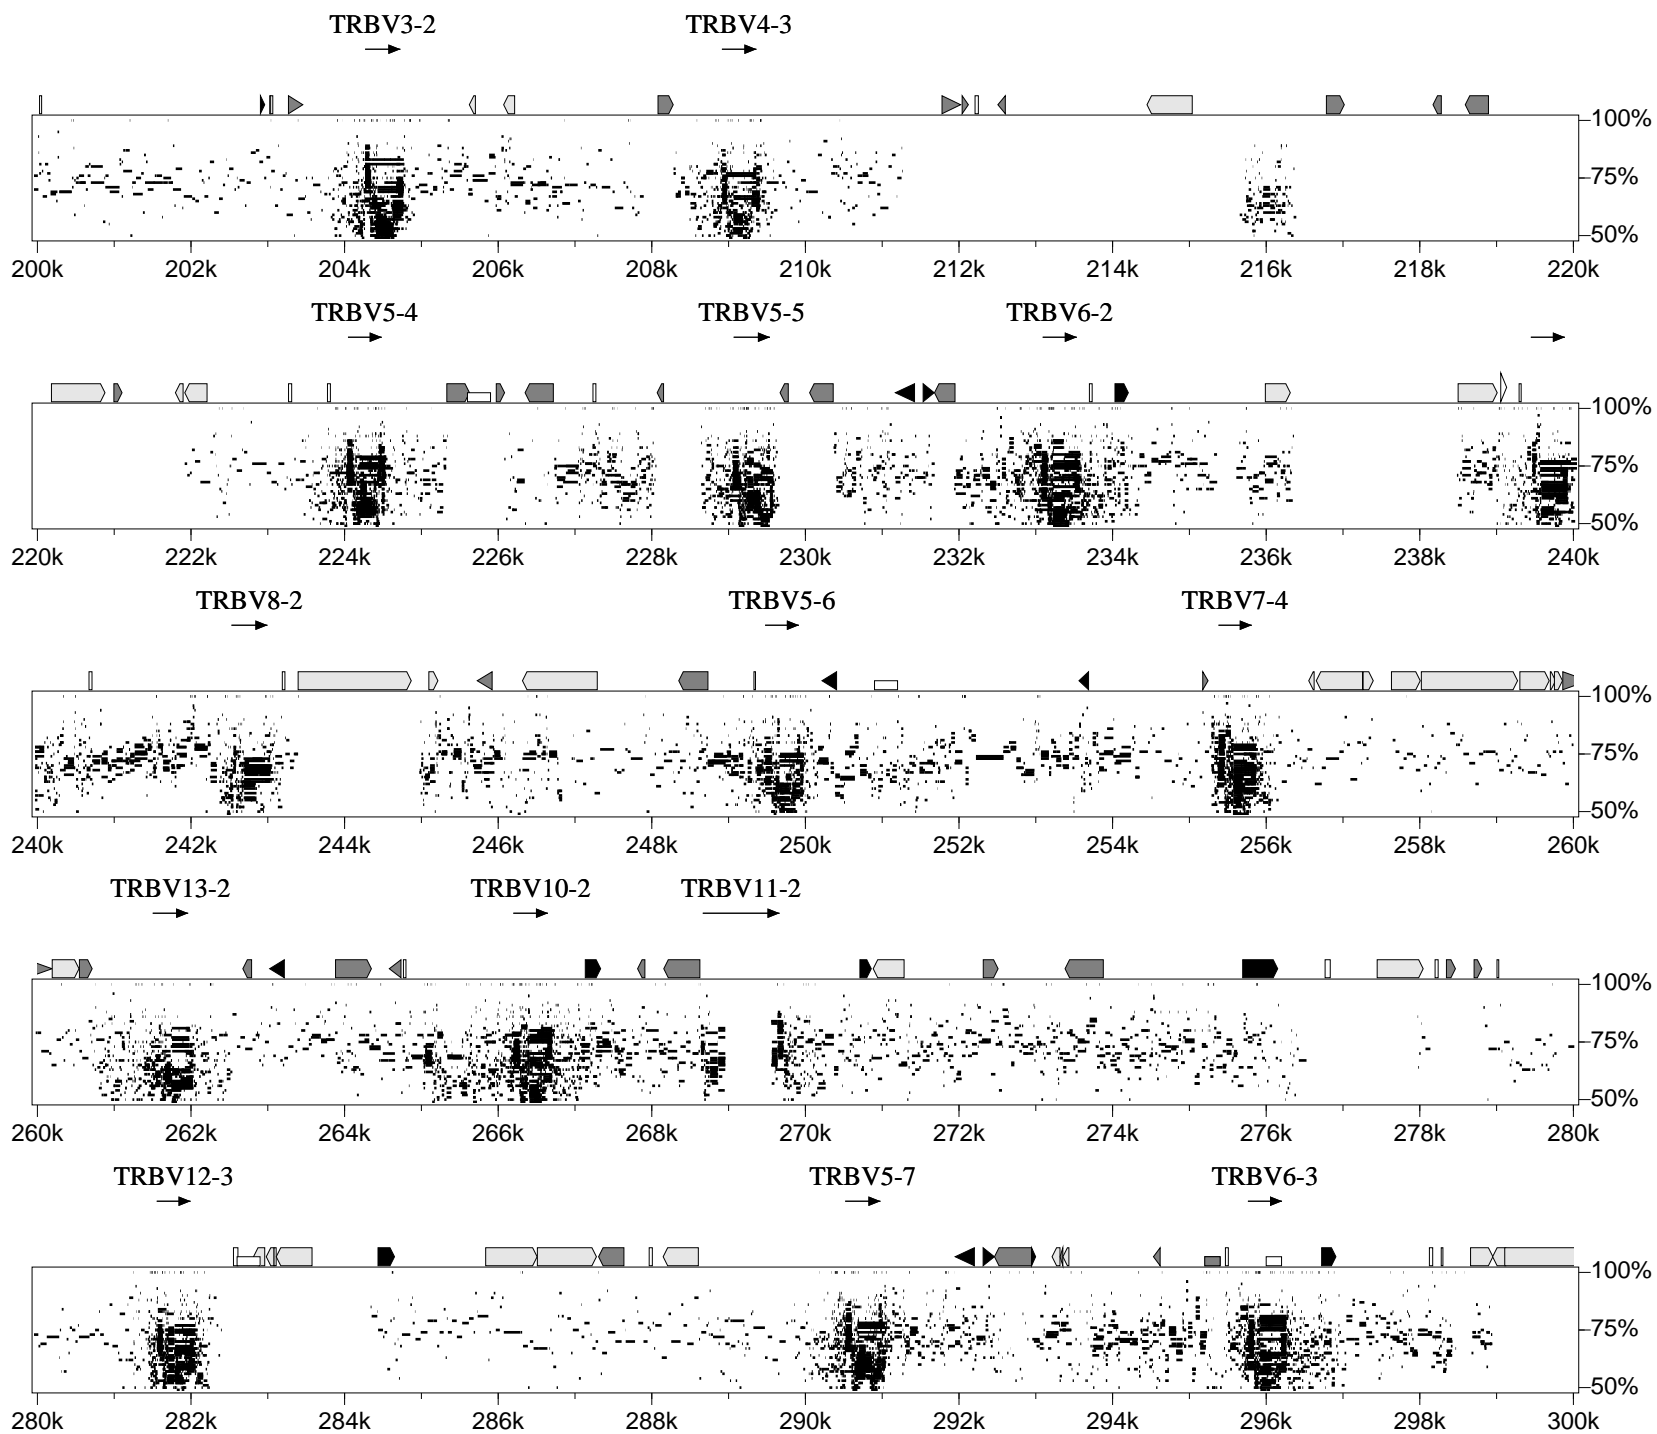

7362 MODX

Gene  
 Exon  
 UTR  
 RNA  
 Simple  
 MIR  
 Other SINE  
 LINE1  
 LINE2  
 LTR  
 Other repeat  
 CpG/GpC $\geq$ 0.60  
 CpG/GpC $\geq$ 0.75

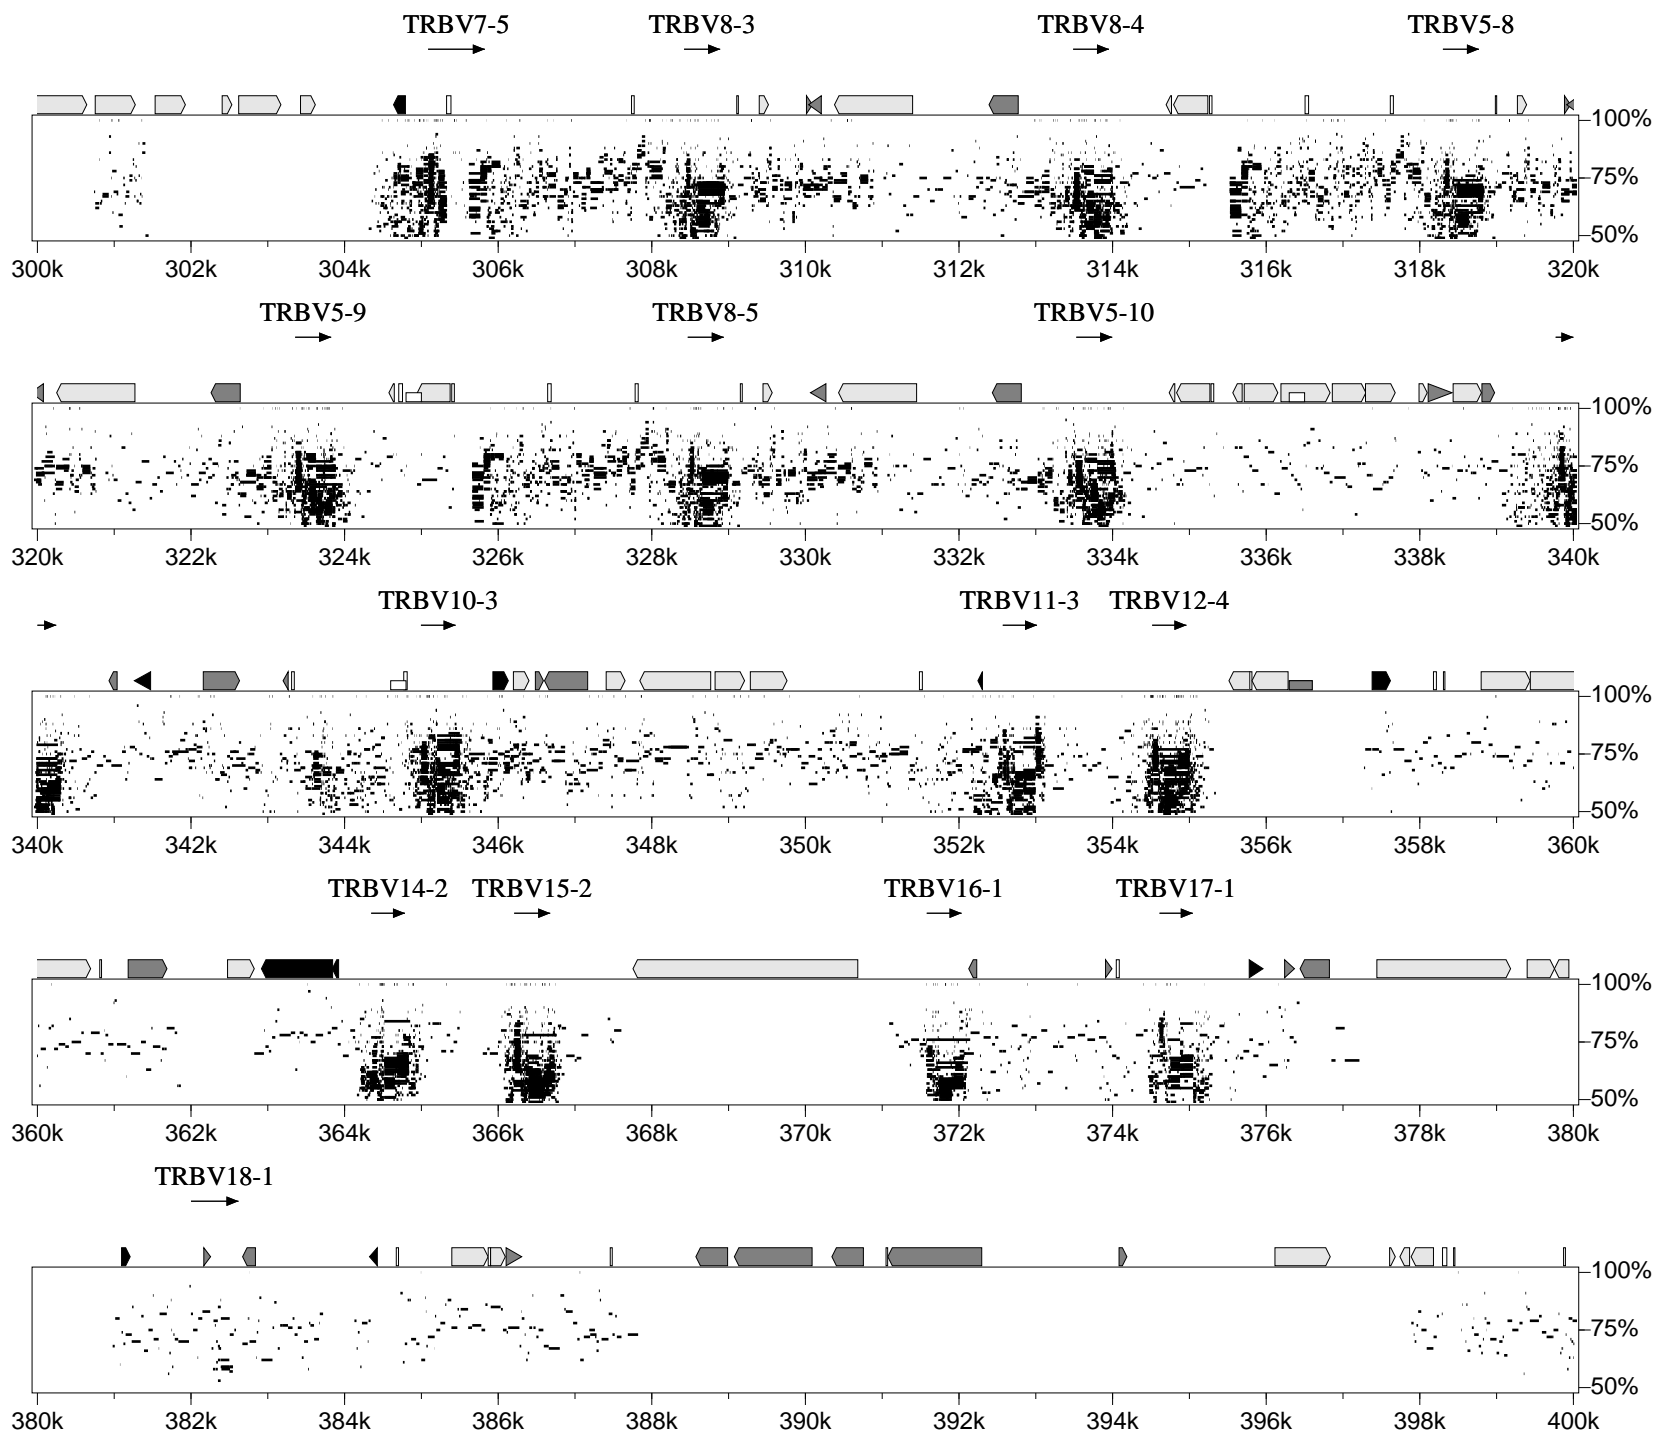

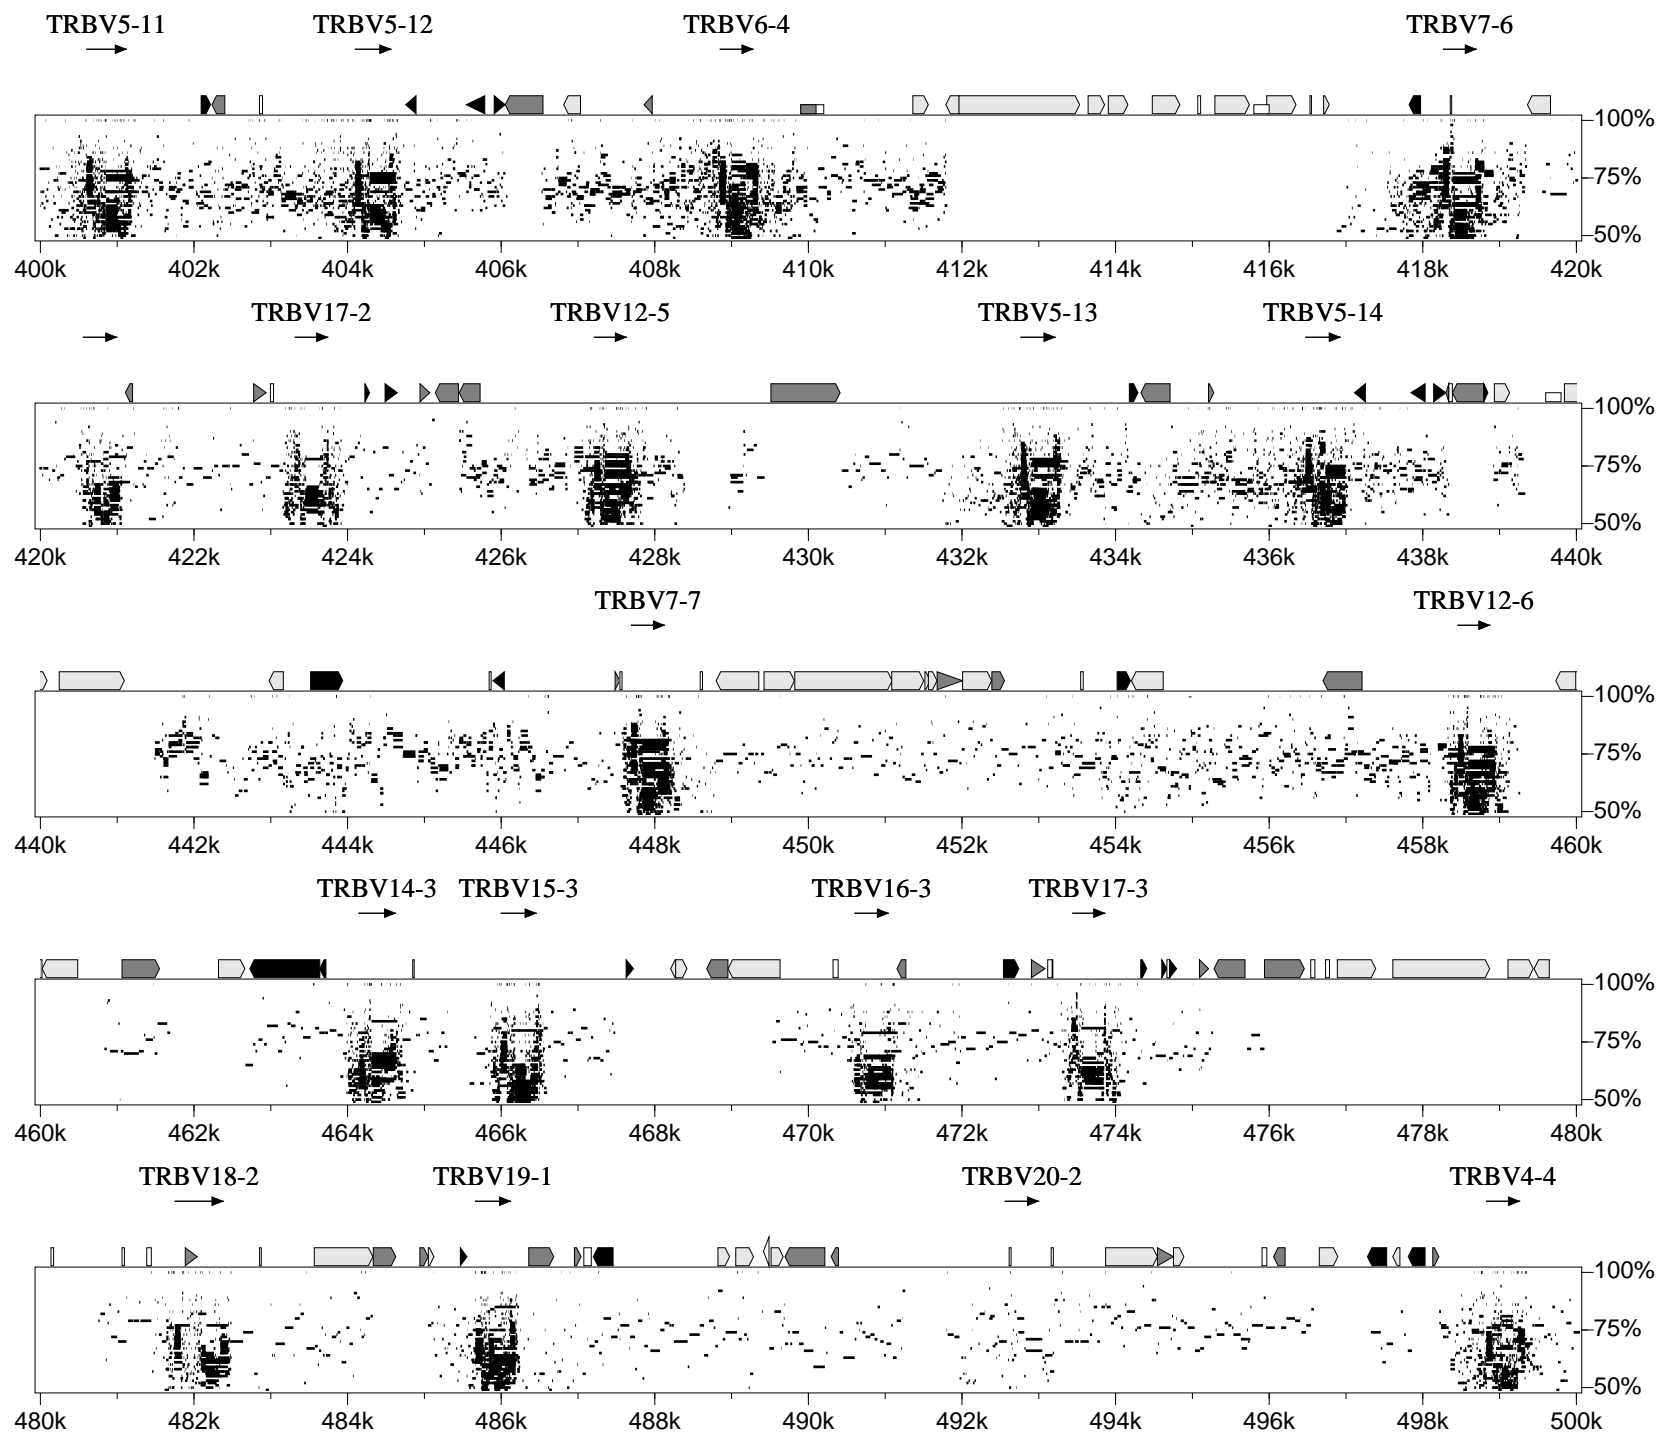



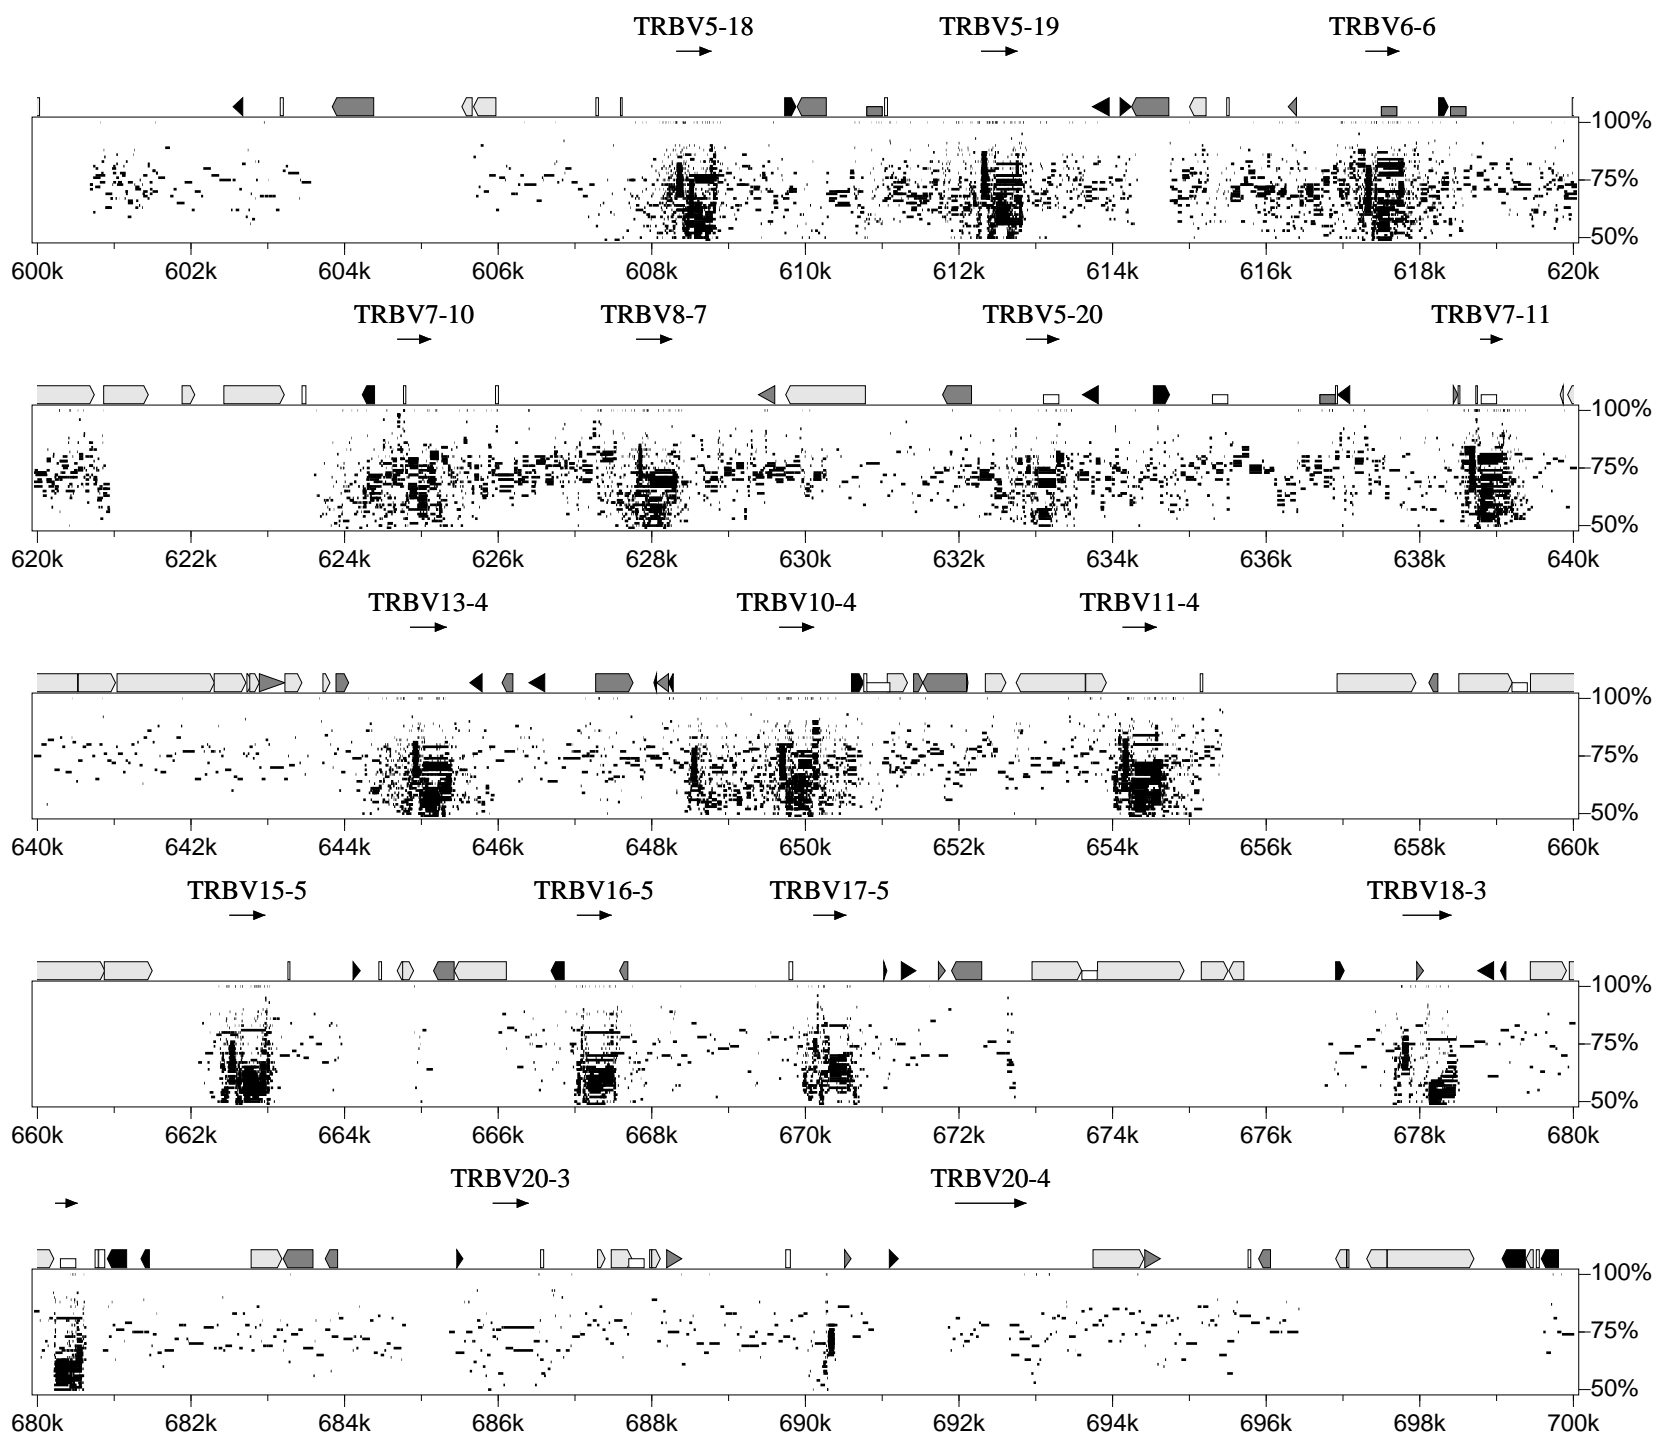

7362 MODX

Gene  
 Exon  
 UTR  
 RNA  
 Simple  
 MIR  
 Other SINE  
 LINE1  
 LINE2  
 LTR  
 Other repeat  
 CpG/GpC $\geq$ 0.60  
 CpG/GpC $\geq$ 0.75

Gene  
 Exon  
 UTR  
 RNA  
 Simple  
 MIR  
 Other SINE  
 LINE1  
 LINE2  
 LTR  
 Other repeat  
 CpG/GpC $\geq$ 0.60  
 CpG/GpC $\geq$ 0.75

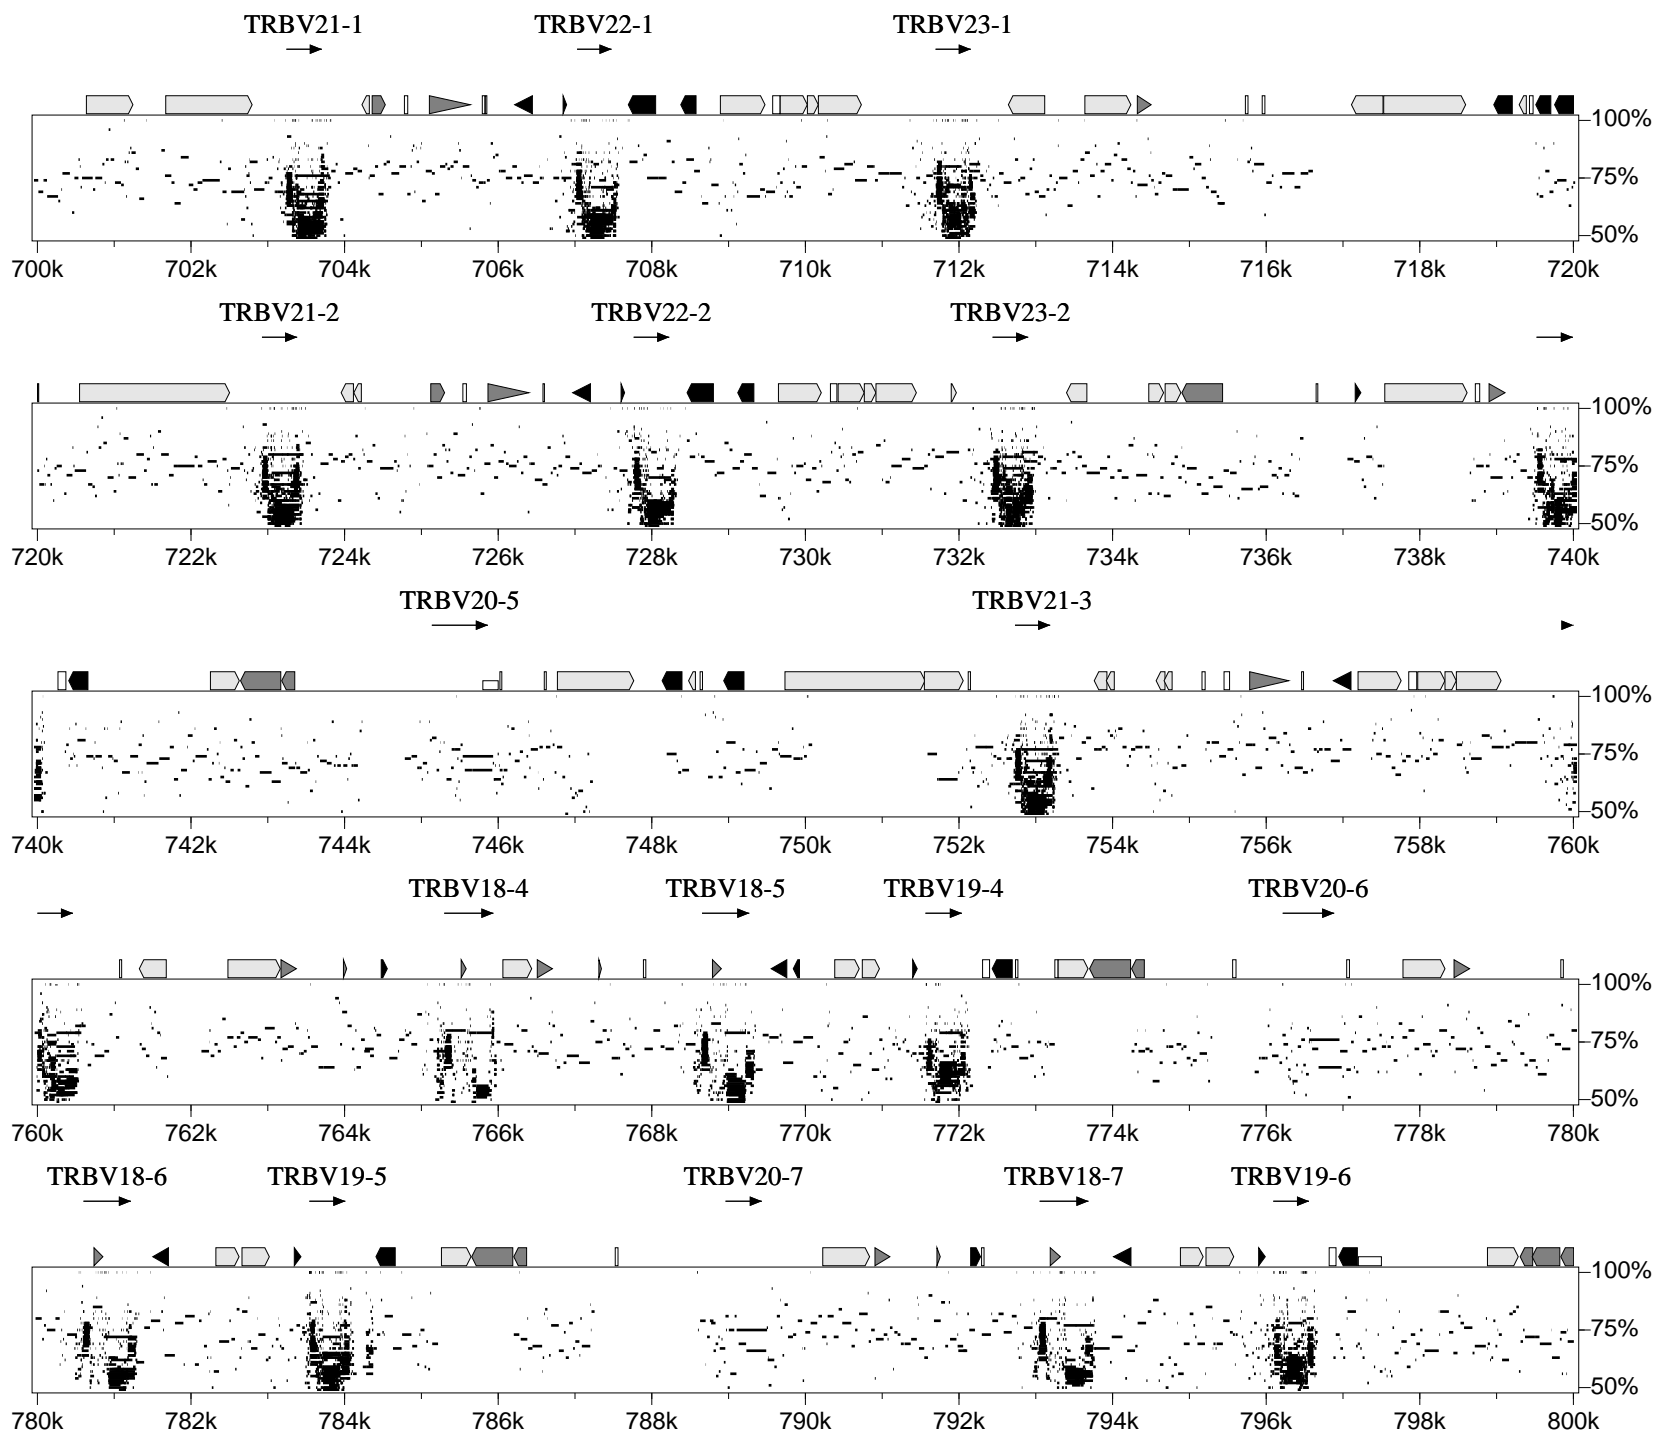



Gene  
 Exon  
 UTR  
 RNA  
 Simple  
 MIR  
 Other SINE  
 LINE1  
 LINE2  
 LTR  
 Other repeat  
 CpG/GpC $\geq$ 0.60  
 CpG/GpC $\geq$ 0.75

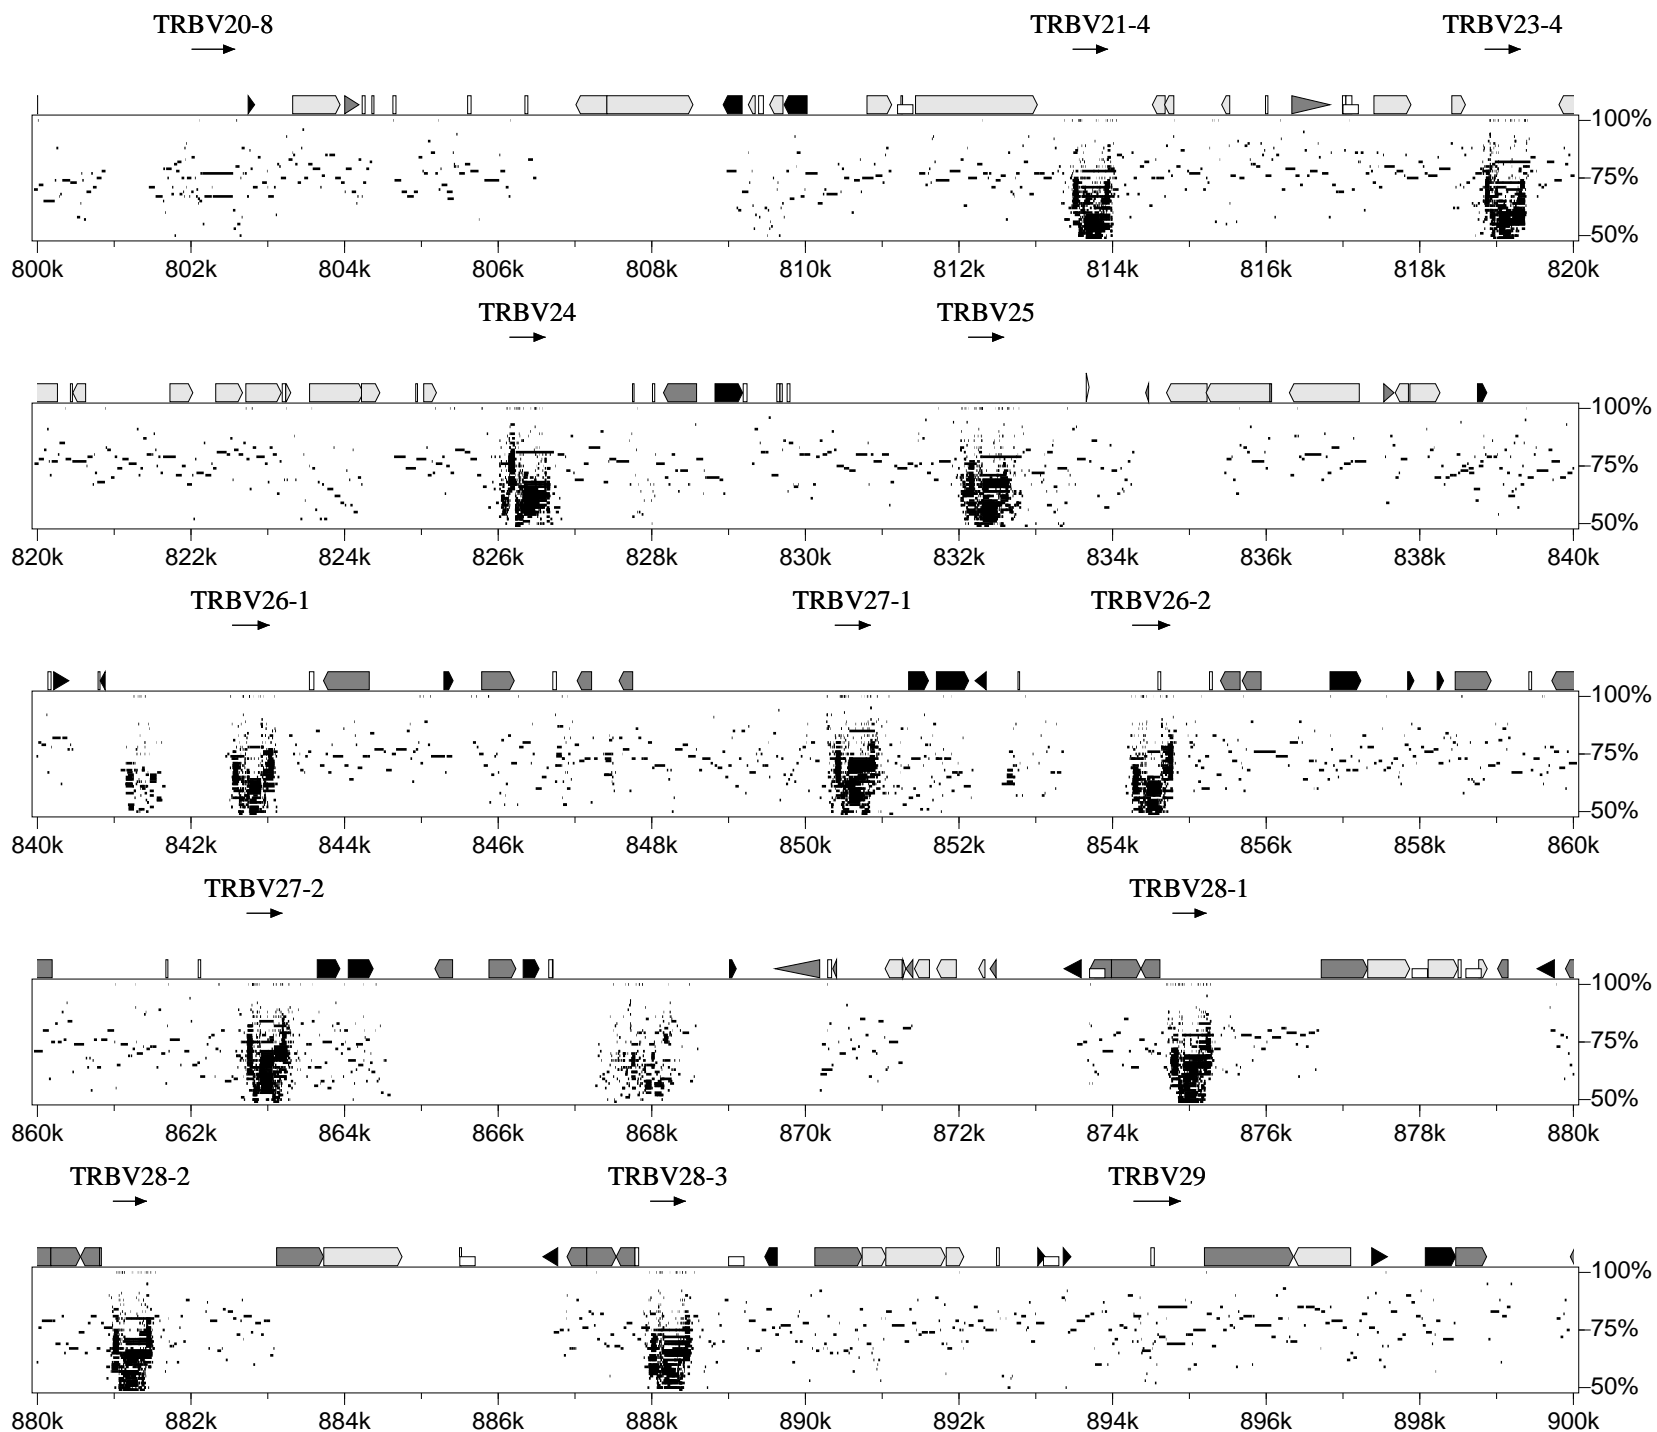

7362 MODX

Wed Jun 19 04:25:40 EDT 2024  
<http://pimaker.bx.psu.edu/pimaker/>  
 Genome Research, Vol. 10, Issue 4, pp577-586, April 2000.

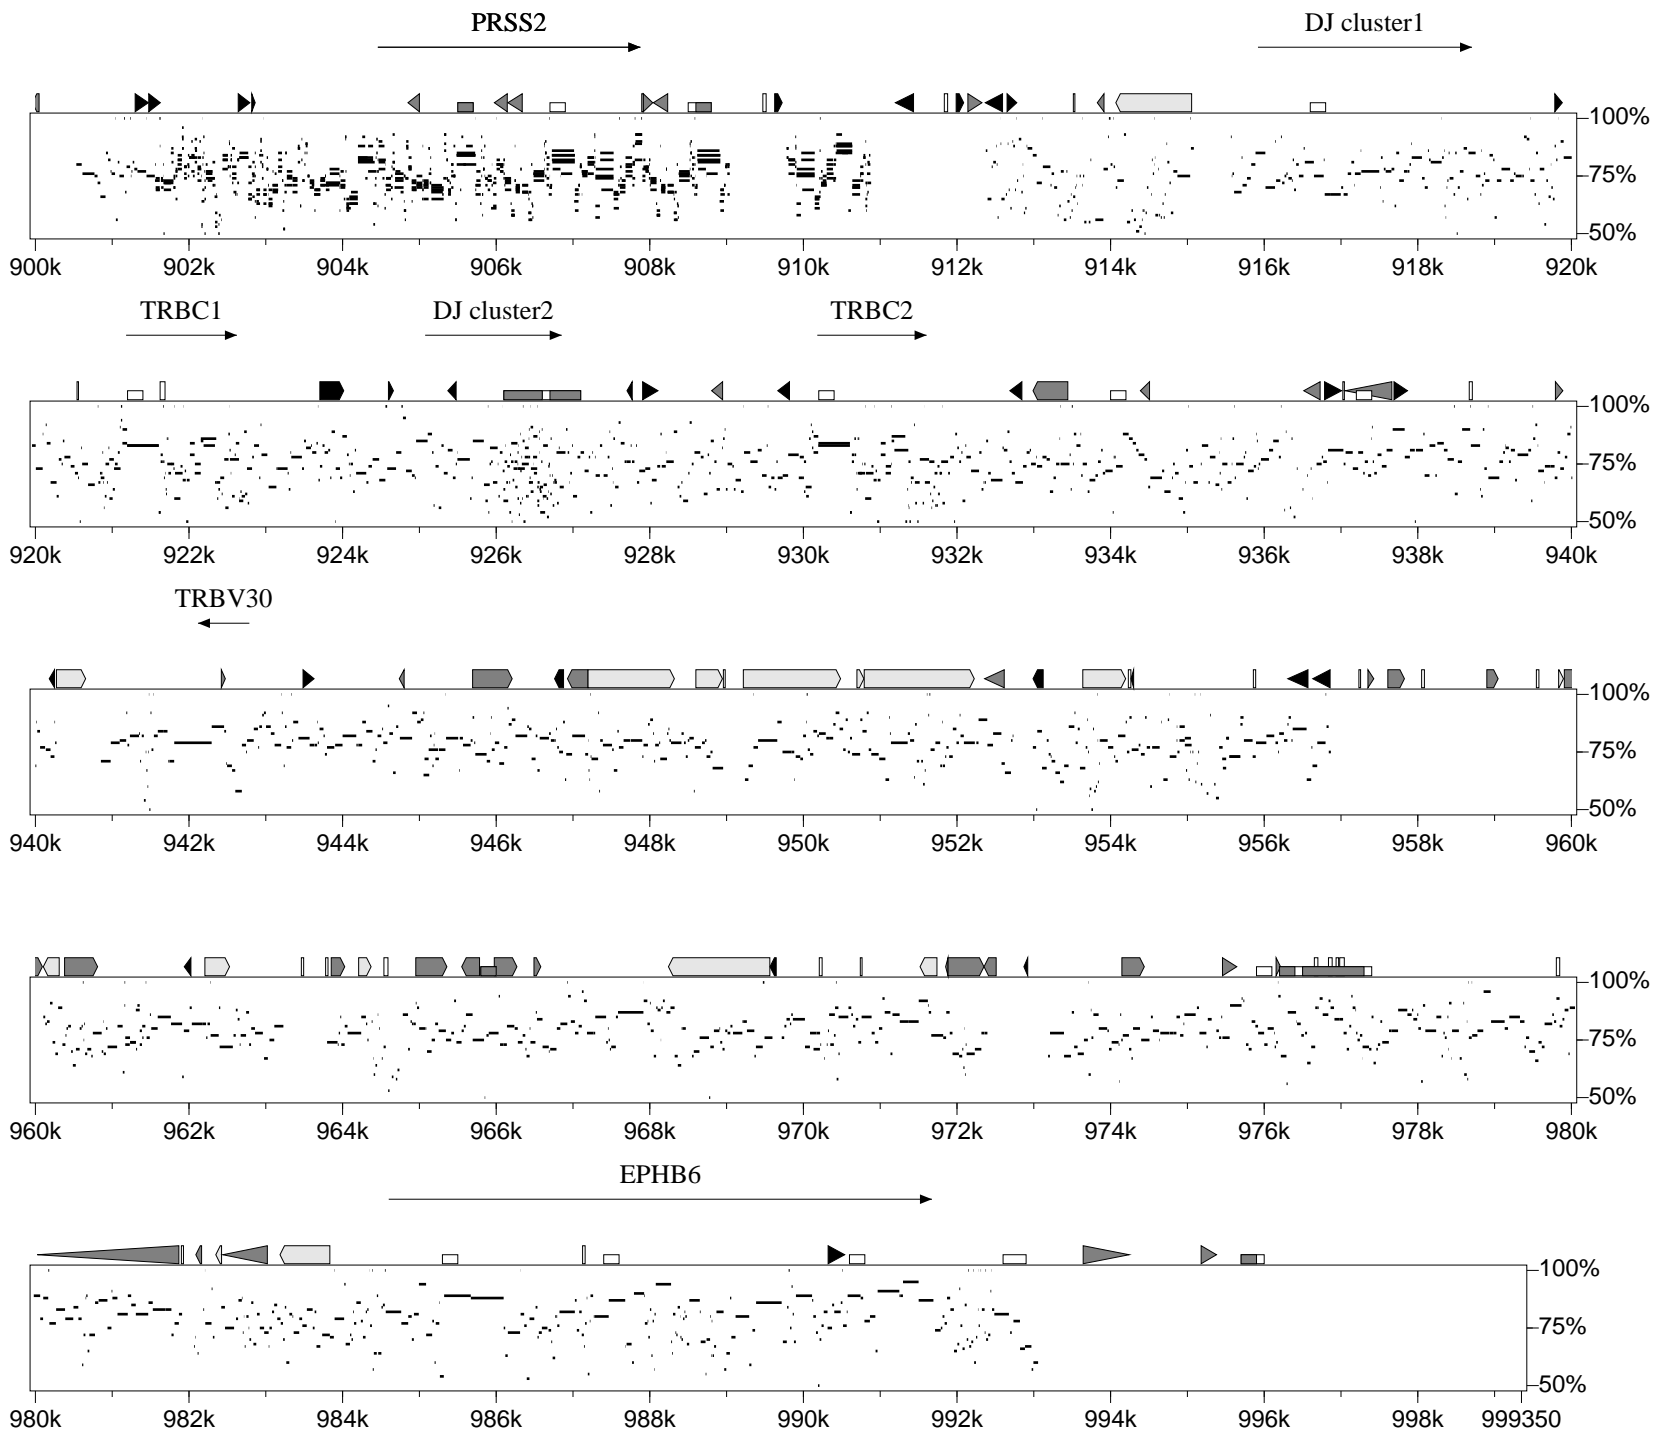

Supplement: Supplementary file 3 [file Figure S2.pdf › Supplementary Files/Figure S2.pdf]
