# Supplementary material for: A Comprehensive Analysis of the Genomic and Expressed Repertoire of the T Cell Receptor Beta Chain in <em>Equus caballus</em>
Source: Preprints.org preprint supplement (doi:10.20944/preprints202408.0599.v1), 2024-08-08
Supplement: Supplementary file 4 [file Table S1.pdf › Supplementary Files/Table S1.pdf]

**Table S1.** Description of the TRB genes in the *Equus caballus* chromosome 4 genome assembly (NCBI Reference Sequence NC\_009147). The position of all genes and their classification and functionality are reported. The position and functionality of the TRY genes is also reported.

| Gene classification | Functionality     | Position <sup>a</sup> |
|---------------------|-------------------|-----------------------|
| TRBV1               | F                 | 95092983-95093616     |
| TRY1                | F                 | 95103788-95110036     |
| TRY2                | F                 | 95115768-95121952     |
| TRY3                | P                 | 95129139-95133471     |
| TRY4                | F                 | 95142197-95147248     |
| TRY5                | F                 | 95167586-95172510     |
| TRY6                | F                 | 95180192-95184292     |
| TRBV4-1             | P <sup>1</sup>    | 95192580-95193024     |
| TRBV2-1             | P <sup>2</sup>    | 95194064-95194531     |
| TRBV3-1             | F                 | 95204414-95204873     |
| TRBV4-2             | P <sup>3</sup>    | 95209501-95209939     |
| TRBV2-2             | F                 | 95212105-95212572     |
| TRBV5-1             | P <sup>4</sup>    | 95218200-95218658     |
| TRBV5-2             | F                 | 95221869-95222345     |
| TRBV6-1             | F <sup>b</sup>    | 95226941-95227384     |
| TRBV7-1             | P <sup>5</sup>    | 95228629-95229074     |
| TRBV8-1             | P <sup>3</sup>    | 95231724-95232192     |
| TRBV5-3             | P <sup>6</sup>    | 95236546-95236989     |
| TRBV7-2             | F                 | 95242450-95242887     |
| TRBV13-1            | P <sup>3</sup>    | 95248816-95249293     |
| TRBV10-1            | F                 | 95252021-95252472     |
| TRBV11-1            | P <sup>3</sup>    | 95256259-95256703     |
| TRBV12-1            | ORF <sup>7</sup>  | 95262123-95262554     |
| TRBV12-2            | F                 | 95269089-95269531     |
| TRBV14-1            | P <sup>8</sup>    | 95274515-95274940     |
| TRBV15-1            | F                 | 95276367-95276839     |
| TRBV20-1            | P <sup>9</sup>    | 95278728-95279200     |
| TRBV3-2             | F                 | 95285336-95285795     |
| TRBV4-3             | P <sup>10</sup>   | 95289982-95290431     |
| TRBV5-4             | ORF <sup>11</sup> | 95305113-95305552     |
| TRBV5-5             | P <sup>3</sup>    | 95310135-95310607     |
| TRBV6-2             | F                 | 95314159-95314603     |
| TRBV7-3             | P <sup>10</sup>   | 95320515-95320958     |
| TRBV8-2             | P <sup>12</sup>   | 95323596-95324064     |
| TRBV5-6             | P <sup>3</sup>    | 95330543-95330983     |
| TRBV7-4             | P <sup>3</sup>    | 95336447-95336880     |
| TRBV13-2            | P <sup>1</sup>    | 95342570-95343031     |
| TRBV10-2            | P <sup>4</sup>    | 95347265-95347716     |
| TRBV11-2            | P <sup>13</sup>   | 95349722-95350724     |
| TRBV12-3            | P <sup>14</sup>   | 95362622-95363062     |
| TRBV5-7             | F                 | 95371586-95372045     |
| TRBV6-3             | F <sup>b</sup>    | 95376830-95377274     |
| TRBV7-5             | P <sup>13</sup>   | 95386155-95386894     |
| TRBV8-3             | P <sup>15</sup>   | 95389488-95389958     |
| TRBV8-4             | ORF <sup>16</sup> | 95394554-95395021     |

|          |                   |                   |
|----------|-------------------|-------------------|
| TRBV5-8  | P <sup>17</sup>   | 95399369-95399838 |
| TRBV5-9  | P <sup>3</sup>    | 95404424-95404893 |
| TRBV8-5  | ORF <sup>16</sup> | 95409536-95410005 |
| TRBV5-10 | P <sup>3</sup>    | 95414595-95415063 |
| TRBV13-3 | P <sup>4</sup>    | 95420837-95421313 |
| TRBV10-3 | P <sup>4</sup>    | 95426062-95426513 |
| TRBV11-3 | P <sup>3</sup>    | 95433638-95434084 |
| TRBV12-4 | P <sup>18</sup>   | 95435583-95436029 |
| TRBV14-2 | F                 | 95445414-95445854 |
| TRBV15-2 | F                 | 95447276-95447745 |
| TRBV16-1 | P <sup>3</sup>    | 95452648-95453101 |
| TRBV17-1 | P <sup>19</sup>   | 95455679-95456112 |
| TRBV18-1 | P <sup>3</sup>    | 95463068-95463686 |
| TRBV5-11 | P <sup>13</sup>   | 95481664-95482194 |
| TRBV5-12 | F                 | 95485163-95485639 |
| TRBV6-4  | F                 | 95489913-95490355 |
| TRBV7-6  | P <sup>3</sup>    | 95499330-95499772 |
| TRBV16-2 | P <sup>3</sup>    | 95501621-95502070 |
| TRBV17-2 | P <sup>3</sup>    | 95504379-95504816 |
| TRBV12-5 | F                 | 95508274-95508705 |
| TRBV5-13 | F                 | 95513828-95514287 |
| TRBV5-14 | P <sup>3</sup>    | 95517538-95518001 |
| TRBV7-7  | F                 | 95528757-95529194 |
| TRBV12-6 | P <sup>4</sup>    | 95539518-95539949 |
| TRBV14-3 | F                 | 95545208-95545648 |
| TRBV15-3 | P <sup>4</sup>    | 95547063-95547531 |
| TRBV16-3 | P <sup>3</sup>    | 95551667-95552117 |
| TRBV17-3 | P <sup>17</sup>   | 95554503-95554935 |
| TRBV18-2 | P <sup>3</sup>    | 95562816-95563454 |
| TRBV19-1 | P <sup>3</sup>    | 95566726-95567197 |
| TRBV20-2 | P <sup>20</sup>   | 95573624-95574073 |
| TRBV4-4  | P <sup>17</sup>   | 95579891-95580336 |
| TRBV2-3  | P <sup>21</sup>   | 95581397-95581848 |
| TRBV3-3  | F                 | 95591602-95592060 |
| TRBV4-5  | P <sup>22</sup>   | 95596480-95596936 |
| TRBV5-15 | F                 | 95611658-95612117 |
| TRBV5-16 | P <sup>14</sup>   | 95615372-95615838 |
| TRBV6-5  | F                 | 95620360-95620804 |
| TRBV7-8  | P <sup>3</sup>    | 95624099-95624534 |
| TRBV8-6  | P <sup>3</sup>    | 95627413-95627885 |
| TRBV5-17 | P <sup>15</sup>   | 95632089-95632534 |
| TRBV7-9  | F                 | 95637949-95638404 |
| TRBV14-4 | F                 | 95663908-95664342 |
| TRBV15-4 | P <sup>19</sup>   | 95666033-95666495 |
| TRBV16-4 | F                 | 95670538-95670991 |
| TRBV17-4 | P <sup>17</sup>   | 95673679-95674112 |
| TRBV12-7 | F                 | 95677332-95677763 |
| TRBV5-18 | P <sup>3</sup>    | 95689385-95689845 |
| TRBV5-19 | F                 | 95693354-95693830 |
| TRBV6-6  | F <sup>b</sup>    | 95698358-95698802 |
| TRBV7-10 | P <sup>23</sup>   | 95705751-95706195 |

|          |                   |                   |
|----------|-------------------|-------------------|
| TRBV8-7  | P <sup>4</sup>    | 95708862-95709333 |
| TRBV5-20 | P <sup>17</sup>   | 95713940-95714373 |
| TRBV7-11 | F                 | 95719705-95720147 |
| TRBV13-4 | F                 | 95725919-95726398 |
| TRBV10-4 | P <sup>3</sup>    | 95730725-95731181 |
| TRBV11-4 | F                 | 95735196-95735643 |
| TRBV15-5 | F                 | 95743566-95744035 |
| TRBV16-5 | F                 | 95748091-95748544 |
| TRBV17-5 | P <sup>17</sup>   | 95751169-95751601 |
| TRBV18-3 | P <sup>21</sup>   | 95758843-95759480 |
| TRBV19-2 | P <sup>24</sup>   | 95761295-95761591 |
| TRBV20-3 | F                 | 95766995-95767464 |
| TRBV20-4 | P <sup>13</sup>   | 95773014-95773945 |
| TRBV21-1 | F                 | 95784309-95784770 |
| TRBV22-1 | P <sup>6</sup>    | 95788094-95788542 |
| TRBV23-1 | P <sup>3</sup>    | 95792762-95793220 |
| TRBV21-2 | F                 | 95803991-95804449 |
| TRBV22-2 | ORF <sup>25</sup> | 95808831-95809294 |
| TRBV23-2 | P <sup>3</sup>    | 95813504-95813968 |
| TRBV19-3 | P <sup>19</sup>   | 95820587-95821060 |
| TRBV20-5 | P <sup>26</sup>   | 95826203-95826932 |
| TRBV21-3 | F                 | 95833795-95834253 |
| TRBV23-3 | P <sup>27</sup>   | 95841061-95841529 |
| TRBV18-4 | P <sup>14</sup>   | 95846363-95847003 |
| TRBV18-5 | P <sup>19</sup>   | 95849720-95850335 |
| TRBV19-4 | P <sup>3</sup>    | 95852629-95853103 |
| TRBV20-6 | P <sup>28</sup>   | 95857281-95857951 |
| TRBV18-6 | P <sup>29</sup>   | 95861666-95862283 |
| TRBV19-5 | P <sup>14</sup>   | 95864607-95865075 |
| TRBV20-7 | P <sup>30</sup>   | 95870026-95870498 |
| TRBV18-7 | P <sup>31</sup>   | 95874116-95874751 |
| TRBV19-6 | P <sup>3</sup>    | 95877158-95877623 |
| TRBV20-8 | P <sup>12</sup>   | 95883074-95883541 |
| TRBV21-4 | F                 | 95894546-95895007 |
| TRBV23-4 | P <sup>32</sup>   | 95899911-95900380 |
| TRBV24   | P <sup>33</sup>   | 95907213-95907683 |
| TRBV25   | F <sup>b</sup>    | 95913185-95913654 |
| TRBV26-1 | P <sup>17</sup>   | 95923601-95924091 |
| TRBV27-1 | F                 | 95931449-95931918 |
| TRBV26-2 | P <sup>17</sup>   | 95935321-95935809 |
| TRBV27-2 | F                 | 95943790-95944257 |
| TRBV28-1 | F                 | 95955846-95956290 |
| TRBV28-2 | F                 | 95962049-95962493 |
| TRBV28-3 | F                 | 95969045-95969509 |
| TRBV29   | F                 | 95975338-95975957 |
| TRY7     | F                 | 95985525-95988943 |
| TRBD1    | F                 | 95996985-95996996 |
| TRBJ1-1  | F                 | 95997629-95997676 |
| TRBJ1-2  | F                 | 95997764-95997811 |
| TRBJ1-3  | F                 | 95998386-95998435 |
| TRBJ1-4  | F                 | 95998989-95999039 |

|         |                |                   |
|---------|----------------|-------------------|
| TRBJ1-5 | F              | 95999261-95999310 |
| TRBJ1-6 | F              | 95999720-95999772 |
| TRBC1   | F              | 96002247-96003690 |
| TRBD2   | F              | 96006141-96006157 |
| TRBJ2-1 | F              | 96006810-96006859 |
| TRBJ2-2 | F              | 96007008-96007058 |
| TRBJ2-3 | F              | 96007271-96007319 |
| TRBJ2-4 | F              | 96007418-96007466 |
| TRBJ2-5 | F              | 96007527-96007575 |
| TRBJ2-6 | F              | 96007651-96007702 |
| TRBJ2-7 | F              | 96007873-96007919 |
| TRBC2   | F              | 96011247-96012670 |
| TRBV30  | P <sup>3</sup> | 96023183-96023852 |

<sup>a</sup> L-PART1/ V-exon for TRBV genes;

<sup>b</sup> STOP CODON at position 108 (last 3' codon of germline CDR3-IMGT) may disappear during rearrangements

<sup>1</sup> frameshift in L-PART1, frameshift in V-exon

<sup>2</sup> STOP-CODON in L-PART1 and in V-exon, no TRP41

<sup>3</sup> frameshift in V-exon

<sup>4</sup> STOP CODON in V-exon

<sup>5</sup> STOP CODONS, frameshift in V-exon

<sup>6</sup> STOP CODON in V exon, noncanonical ACCEPTOR-SPLICE

<sup>7</sup> no CYS23

<sup>8</sup> del in L-PART1, STOP-CODON in V-exon

<sup>9</sup> noncanonical L-PART1 and DONOR-SPLICE

<sup>10</sup> noncanonical L-PART1, STOP CODONS in V exon

<sup>11</sup> del in V-exon

<sup>12</sup> frameshift in L-PART1

<sup>13</sup> Insertion of genomic sequence in coding region

<sup>14</sup> no INIT-CODON, frameshift in V-exon

<sup>15</sup> no INIT-CODON

<sup>16</sup> noncanonical ACCEPTOR-SPLICE

<sup>17</sup> noncanonical DONOR-SPLICE, frameshift in V-exon

<sup>18</sup> no INIT-CODON, noncanonical ACCEPTOR-SPLICE, STOP CODONS in V exon

<sup>19</sup> noncanonical ACCEPTOR-SPLICE, frameshift in V-exon

<sup>20</sup> noncanonical L-PART1 and DONOR and ACCEPTOR-SPLICE, frameshift in V-exon

<sup>21</sup> STOP CODONS in V-exon

<sup>22</sup> STOP CODONS in L-PART1 and in V-exon, noncanonical DONOR-SPLICE

<sup>23</sup> noncanonical L-PART1 and ACCEPTOR -SPLICE, frameshift in V-exon

<sup>24</sup> no L-PART1

<sup>25</sup> no TRP41 and CYS23

<sup>26</sup> no INIT-CODON, noncanonical ACCEPTOR-SPLICE

<sup>27</sup> del in L-PART1, frameshift in V-exon, noncanonical RS

<sup>28</sup> noncanonical L-PART1 and DONOR and ACCEPTOR-SPLICE

<sup>29</sup> noncanonical ACCEPTOR-SPLICE, STOP CODONS in V exon

<sup>30</sup> noncanonical DONOR-SPLICE

<sup>31</sup> STOP CODONS in L-PART1, noncanonical ACCEPTOR-SPLICE, frameshift in V-exon

<sup>32</sup> del in L-PART1

<sup>33</sup> STOP CODON in V-exon, no CYS104
