# Supplementary material for: A Comprehensive Analysis of the Genomic and Expressed Repertoire of the T Cell Receptor Beta Chain in <em>Equus caballus</em>
Source: Preprints.org preprint supplement (doi:10.20944/preprints202408.0599.v1), 2024-08-08
Supplement: Supplementary file 5 [file Table S2.pdf › Supplementary Files/Table S2.pdf]

**Table S2.** Output file of the program RepeatMasker. Summary of the repeat content of horse TRBV-cluster is shown. The GC levels are also indicated.

|                                                                                         |                        |                    |                           |
|-----------------------------------------------------------------------------------------|------------------------|--------------------|---------------------------|
| =====                                                                                   |                        |                    |                           |
| file name:                                                                              | Horse TRBV-cluster     |                    |                           |
| total length:                                                                           | 907877 bp              |                    |                           |
| GC level:                                                                               | 41.62 %                |                    |                           |
| bases masked:                                                                           | 275499 bp (30.35 %)    |                    |                           |
| =====                                                                                   |                        |                    |                           |
|                                                                                         | number of<br>elements* | length<br>occupied | percentage<br>of sequence |
| -----                                                                                   |                        |                    |                           |
| SINEs:                                                                                  | 97                     | 15105 bp           | 1.66 %                    |
| Alu/B1                                                                                  | 0                      | 0 bp               | 0.00 %                    |
| MIRs                                                                                    | 97                     | 15105 bp           | 1.66 %                    |
| LINEs:                                                                                  | 300                    | 179503 bp          | 19.77 %                   |
| LINE1                                                                                   | 213                    | 155529 bp          | 17.13 %                   |
| LINE2                                                                                   | 76                     | 22007 bp           | 2.42 %                    |
| L3/CR1                                                                                  | 10                     | 1631 bp            | 0.18 %                    |
| RTE                                                                                     | 1                      | 336 bp             | 0.04 %                    |
| LTR elements:                                                                           | 150                    | 55197 bp           | 6.08 %                    |
| ERVL                                                                                    | 65                     | 25142 bp           | 2.77 %                    |
| ERVL-MaLRs                                                                              | 51                     | 18031 bp           | 1.99 %                    |
| ERV_classI                                                                              | 27                     | 11215 bp           | 1.24 %                    |
| ERV_classII                                                                             | 4                      | 334 bp             | 0.04 %                    |
| DNA elements:                                                                           | 90                     | 16347 bp           | 1.80 %                    |
| hAT-Charlie                                                                             | 41                     | 8468 bp            | 0.93 %                    |
| TcMar-Tigger                                                                            | 5                      | 891 bp             | 0.10 %                    |
| Unclassified:                                                                           | 0                      | 0 bp               | 0.00 %                    |
| Total interspersed repeats:                                                             |                        | 266152 bp          | 29.32 %                   |
| Small RNA:                                                                              | 4                      | 263 bp             | 0.03 %                    |
| Satellites:                                                                             | 2                      | 183 bp             | 0.02 %                    |
| Simple repeats:                                                                         | 188                    | 7060 bp            | 0.78 %                    |
| Low complexity:                                                                         | 39                     | 1895 bp            | 0.21 %                    |
| =====                                                                                   |                        |                    |                           |
| *most repeats fragmented by insertions or deletions have<br>been counted as one element |                        |                    |                           |
